# Supplementary material for: Immunogenicity of Biosimilars for Rheumatic Diseases, Plaque Psoriasis, and Inflammatory Bowel Disease: A Review from Clinical Trials and Regulatory Documents
Source: PubMed Central journal article supplement — BioDrugs. 2019 Nov 13;34(1):27–37. doi: 10.1007/s40259-019-00394-x (PMC7042210; doi:10.1007/s40259-019-00394-x), 2019-11-13
Supplement: 40259_2019_394_MOESM1_ESM.pdf [file 40259_2019_394_MOESM1_ESM.pdf]

**Immunogenicity of Biosimilars for Rheumatic Diseases, Plaque Psoriasis, and Inflammatory Bowel Disease: A Review from Clinical Trials and Regulatory Documents**

Vibeke Strand, Joao Gonçalves, Timothy P. Hickling, Heather E. Jones, Lisa Marshall, John D. Isaacs

**Electronic Supplementary Material**

*BioDrugs*, 2019

**Table 1. Characteristics of ADAb and nAb assays**

| <b>Biosimilar / Manufacturer</b>                            | <b>Study</b>                                                              | <b>ADAb Assay</b>                                                                            | <b>nAb Assay</b>                                                                                    | <b>Immunogenicity blood sample collection</b>                   | <b>Differentiation between IgG subtypes?</b>                                                                                                          |
|-------------------------------------------------------------|---------------------------------------------------------------------------|----------------------------------------------------------------------------------------------|-----------------------------------------------------------------------------------------------------|-----------------------------------------------------------------|-------------------------------------------------------------------------------------------------------------------------------------------------------|
| <b>Reference product: Adalimumab</b>                        |                                                                           |                                                                                              |                                                                                                     |                                                                 |                                                                                                                                                       |
| <b>Healthy volunteers</b>                                   |                                                                           |                                                                                              |                                                                                                     |                                                                 |                                                                                                                                                       |
| Cyltezo (BI 695501)<br><br>Boehringer Ingelheim             | VOLTAIRE-PK (NCT02045979) [19]                                            | Homogeneous ECL bridging assay (single assay, 3-tiered approach) with acid dissociation step | Inhibition of an in vitro functional activity in a cell-based format (TNF $\alpha$ -dependent ADCC) | Baseline (predose) and Days 1-9, 14, 21, 28, 35, 44, 56, and 71 | n/a                                                                                                                                                   |
| Imraldi (SB5)<br><br>Samsung Bioepis                        | SB5-G11-NHV (NCT02144714) [20]                                            | ECL bridging assay (biotin and ruthenium), two-tiered approach                               | Competitive ligand-binding assay                                                                    | Days 1 (predose), 15 (Week 2), and 71 (Week 10)                 | n/a                                                                                                                                                   |
| Solymbic (ABP 501, adalimumab-atto)<br><br>Amgen            | EudraCT 2012-000785-37 [21]                                               | ECL bridging assay that detects all antibody classes [93]                                    | A cell-based assay using TNF $\alpha$ -induced phosphorylation of NF $\kappa$ B                     | Days 1 (predose), 16, 29, and 63 (Weeks 2, 4, and 9)            | No<br><br>Both ADAb and nAb assays were expected to detect all antibody classes that inhibit biologic activity of the drug, including monovalent IgG4 |
| Hulio (FKB327)<br><br>Fujifilm Kyowa Kirin Biologics, Mylan | FKB327-001, EudraCT 2012-005140-23 [22, 33]                               | ECL assay (insufficient drug tolerance limit; many inconclusive samples)                     | ECL competitive assay (insufficient drug tolerance limit; many inconclusive samples)                | Baseline and Days 15 (Week 2), 29 (Week 4), and 64 (Week 9)     | n/a                                                                                                                                                   |
| Hyrimoz (GP2017, adalimumab-adaz)<br><br>Hexal/Sandoz       | GP17-101 (EudraCT 2012-004205-27), GP17-104 (EudraCT 2015-000579-28) [23] | multi-tiered ECL bridging assay                                                              | Competitive ligand-binding assay                                                                    | Days 1-10, 16, 23, 30, 44, 58, and 72                           | n/a                                                                                                                                                   |

| <b>Biosimilar / Manufacturer</b>                              | <b>Study</b>                                                                                       | <b>ADAb Assay</b>                                      | <b>nAb Assay</b>                                                                                    | <b>Immunogenicity blood sample collection</b>                                          | <b>Differentiation between IgG subtypes?</b>                                                                                               |
|---------------------------------------------------------------|----------------------------------------------------------------------------------------------------|--------------------------------------------------------|-----------------------------------------------------------------------------------------------------|----------------------------------------------------------------------------------------|--------------------------------------------------------------------------------------------------------------------------------------------|
| MSB11022<br>Merck                                             | EMR200588-001<br>(NCT03014947)<br>[24]                                                             | single ECL assay with acid dissociation                | n/a                                                                                                 | Day 1 (predose) and Days 15 (Week 2), 29 (Week 4), 43 (Week 6), and 71 (Week 10)       | n/a                                                                                                                                        |
| <b>Rheumatic diseases</b>                                     |                                                                                                    |                                                        |                                                                                                     |                                                                                        |                                                                                                                                            |
| Cyltezo<br>(BI 695501)<br>Boehringer<br>Ingelheim             | VOLTAIRE-RA<br>(NCT02137226)<br>[30]                                                               | Homogeneous ECL bridging assay (single assay approach) | Inhibition of an in vitro functional activity in a cell-based format (TNF $\alpha$ -dependent ADCC) | Baseline (predose) and Weeks 1, 2, 4, 12, 24, 40, 48, and 58                           | n/a                                                                                                                                        |
| Imraldi<br>(SB5)<br>Samsung Bioepis                           | SB5-G31-RA<br>(NCT02167139)<br>[31, 70]                                                            | Bridging ligand-binding ECL assay                      | Inhibition of TNF $\alpha$ binding to immobilized SB5 by circulating ADABs                          | <b>Baseline-Week 24:</b><br>Baseline, Weeks 4, 8, 16, and 24                           | n/a                                                                                                                                        |
| Solymbic<br>(ABP 501,<br>adalimumab-atto)<br>Amgen            | 20120262<br>(NCT01970475)<br>[32]                                                                  | ECL bridging assay                                     | Ligand-binding bioassay                                                                             | Baseline and Weeks 4, 12, and 26                                                       | No<br><br>The nAb assay was expected to detect all antibody classes that inhibit biologic activity of the drug, including monovalent IgG4. |
| Hulio (FKB327)<br>Fujifilm Kyowa<br>Kirin Biologics,<br>Mylan | FKB327-002,<br>ARABESC<br>(NCT02260791)<br>and FKB327-003,<br>ARABESC-OLE<br>(NCT02405780)<br>[33] | n/a                                                    | n/a                                                                                                 | FBK327-002: Baseline and Weeks 2, 4, 12, 24; FKB327-003: Weeks 36, 48, 54, 78, and 100 | n/a                                                                                                                                        |
| PF-06410293<br>Pfizer                                         | REFLECTIONS<br>B538-02<br>(NCT02480153)<br>[34]                                                    | ECL assay                                              | Cell-based assay                                                                                    | Baseline and weeks 2, 6, 12, and 26                                                    | n/a                                                                                                                                        |

| <b>Biosimilar / Manufacturer</b>                 | <b>Study</b>                                           | <b>ADAb Assay</b>                                                                                                                                          | <b>nAb Assay</b>                 | <b>Immunogenicity blood sample collection</b>                                 | <b>Differentiation between IgG subtypes?</b> |
|--------------------------------------------------|--------------------------------------------------------|------------------------------------------------------------------------------------------------------------------------------------------------------------|----------------------------------|-------------------------------------------------------------------------------|----------------------------------------------|
| Exemptia (ZRC-3197)<br>Cadila Healthcare         | [NOT REGISTERED AT ClinicalTrials.gov or EudraCT] [35] | n/a                                                                                                                                                        | n/a                              | Baseline and weeks 4 and 12                                                   | n/a                                          |
| <b>Plaque psoriasis</b>                          |                                                        |                                                                                                                                                            |                                  |                                                                               |                                              |
| Solymbic (ABP 501, adalimumab-atto)<br>Amgen     | 20120263 (NCT01970488) [54, 69]                        | 2-tiered ECL bridging assay                                                                                                                                | n/a                              | Baseline, Weeks 4, 16, 20, 32, and 52                                         | n/a                                          |
| Hyrimoz (GP2017)<br>Hexal/Sandoz                 | GP17-301 (NCT02016105) [23, 55]                        | multi-tiered ECL bridging assay                                                                                                                            | Competitive ligand-binding assay | Baseline and Weeks 3, 7, 11, 17, 23, 29, 35, 41, 47, and 51                   | n/a                                          |
| <b>Reference product: Etanercept</b>             |                                                        |                                                                                                                                                            |                                  |                                                                               |                                              |
| <b>Healthy volunteers</b>                        |                                                        |                                                                                                                                                            |                                  |                                                                               |                                              |
| Benepali (SB4)<br>Samsung Bioepis                | SB4-G11-NHV (NCT01865552) [25]                         | ECL bridging assay                                                                                                                                         | Cell-based assay                 | Predose in period 1 (Day 1) and predose in period 2 (Day 29)                  | n/a                                          |
| Erelzi (GP2015, etanercept-szss)<br>Hexal/Sandoz | Studies GP15-101, GP15-102, and GP15-104 [26]          | Bridging ECL assay (screening, followed by confirmatory assay), including acid dissociation steps (acid dissociation inferred based on EGALITY trial [56]) | Competitive ligand-binding assay | n/a                                                                           | n/a                                          |
| LBEC0101<br>LG Chem                              | LG-ECCL003 (NCT01725620) [27]                          | Affinity capture elution assay, with acid dissociation step                                                                                                | n/a                              | Before the first dose and at 36 days after both the first and the second dose | n/a                                          |
| <b>Rheumatic diseases</b>                        |                                                        |                                                                                                                                                            |                                  |                                                                               |                                              |

| <b>Biosimilar / Manufacturer</b>                                | <b>Study</b>                                      | <b>ADAb Assay</b>                                                                                 | <b>nAb Assay</b>                                                    | <b>Immunogenicity blood sample collection</b>   | <b>Differentiation between IgG subtypes?</b> |
|-----------------------------------------------------------------|---------------------------------------------------|---------------------------------------------------------------------------------------------------|---------------------------------------------------------------------|-------------------------------------------------|----------------------------------------------|
| Benepali (SB4)                                                  | SB4-G31-RA (NCT01895309) [36, 79, 80]             | ECL (single assay with SB4 tag), with acid dissociation step                                      | Competitive ligand-binding assay                                    | Weeks 0, 2, 4, 8, 12, 16, 24, and 52            | n/a                                          |
| CHS-0214<br>Coherus BioSciences                                 | CHS-0214-02, Part 1 and Part 2 (NCT02115750) [37] | n/a                                                                                               | n/a                                                                 | n/a                                             | n/a                                          |
| LBEC0101<br>LG Chem                                             | LG-ECCL002 (NCT02357069) [38]                     | ECL, using biotinylated ETN-RP and SULFO-TAG labelled ETN-RP                                      | ECL, using biotinylated ETN-RP and SULFO-TAG labelled TNF- $\alpha$ | Baseline and Weeks 12, 24, and 52               | n/a                                          |
| <b>Plaque psoriasis</b>                                         |                                                   |                                                                                                   |                                                                     |                                                 |                                              |
| Erelzi (GP2015, etanercept-szss)<br>Hexal/Sandoz                | EGALITY, Study GP15- 302 (NCT01891864) [56, 81]   | Bridging ECL assay (screening, followed by confirmatory assay), including acid dissociation steps | Competitive ligand-binding assay                                    | n/a                                             | n/a                                          |
| <b>Reference product: Infliximab</b>                            |                                                   |                                                                                                   |                                                                     |                                                 |                                              |
| <b>Healthy volunteers</b>                                       |                                                   |                                                                                                   |                                                                     |                                                 |                                              |
| Flixabi/<br>Renflexis (SB2, infliximab-abda)<br>Samsung Bioepis | SB2-G11-NHV, NCT01922336 [28]                     | ECL                                                                                               | Cell-based assay                                                    | Days 1 (predose), 29 (Week 4), and 71 (Week 10) | n/a                                          |
| Inflextra (CT-P13, infliximab-dyyb)                             | CT-P13 1.4 (EudraCT 2013-003173-10) [29, 67]      | ECL; reanalysis using ELISA                                                                       | Flow-through immunoassay (Gyros immunoassay platform)               | Day 1, Week 8                                   | n/a                                          |

| <b>Biosimilar / Manufacturer</b>                                                           | <b>Study</b>                                                                            | <b>ADAb Assay</b> | <b>nAb Assay</b>                                      | <b>Immunogenicity blood sample collection</b>                                 | <b>Differentiation between IgG subtypes?</b> |
|--------------------------------------------------------------------------------------------|-----------------------------------------------------------------------------------------|-------------------|-------------------------------------------------------|-------------------------------------------------------------------------------|----------------------------------------------|
| Celltrion                                                                                  |                                                                                         |                   |                                                       |                                                                               |                                              |
| <b>Rheumatic diseases</b>                                                                  |                                                                                         |                   |                                                       |                                                                               |                                              |
| Flixabi/<br>Renflexis<br>(SB2, infliximab-abda)<br><br>Samsung Bioepis                     | SB2-G31-RA<br>(NCT01936181)<br>[39, 77, 78]                                             | ECL               | Competitive ligand-binding assay                      | Baseline and Weeks 2, 6, 14, 22, 30, 38, 46, 54, 62, 70, and 78 (all predose) | n/a                                          |
| Inflectra<br>(CT-P13, infliximab-dyyb)<br><br>Celltrion                                    | PLANETRA (CT-P13 3.1, NCT01217086) [44, 94]<br><br>and PLANETRA OLEX (NCT01571219) [45] | ECL               | Flow-through immunoassay (Gyros immunoassay platform) | Screening, and Weeks 14, 30, 54, 78, and 102                                  | n/a                                          |
| Inflectra, Remsima<br>(CT-P13, infliximab-dyyb)<br><br>Nippon Kayaku Co. Ltd.<br>Celltrion | JAPIC Clinical Trials Information Center study JapicCTI-111620 [42]                     | ECL               | Flow-through immunoassay (Gyros immunoassay platform) | Weeks 14, 30, and 54                                                          | n/a                                          |
| Inflectra<br>(CT-P13, infliximab-dyyb)<br><br>Celltrion                                    | PLANETAS (CT-P13 1.1, NCT01220518) [40, 74] and PLANETAS OLEX (NCT01571206) [41]        | ECL               | Flow-through immunoassay (Gyros immunoassay platform) | Screening, and Weeks 14, 30, 54, 78, and 102                                  | n/a                                          |

| <b>Biosimilar / Manufacturer</b>                           | <b>Study</b>                                             | <b>ADAb Assay</b>                    | <b>nAb Assay</b>          | <b>Immunogenicity blood sample collection</b> | <b>Differentiation between IgG subtypes?</b> |
|------------------------------------------------------------|----------------------------------------------------------|--------------------------------------|---------------------------|-----------------------------------------------|----------------------------------------------|
| Inflectra (CT-P13, infliximab-dyyb)<br><br>Celltrion       | BIO-SWITCH, Dutch Trial Register identifier NTR5297 [43] | RIA [95]                             | n/a                       | Baseline and Month 6                          | n/a                                          |
| Ixifi (PF-06438179/ GP1111, infliximab-qbtx)<br><br>Pfizer | REFLECTIONS B537-02 (NCT02222493) [46]                   | ECL                                  | Cell-based assay          | Baseline and Weeks 2, 6, 14, and 30           | n/a                                          |
| <b>IBD</b>                                                 |                                                          |                                      |                           |                                               |                                              |
| Inflectra (CT-P13, infliximab-dyyb)<br><br>Celltrion       | NOR-SWITCH (NCT02148640) [63]                            | n/a (only nAb assay was performed)   | In-house inhibition assay | n/a                                           | n/a                                          |
| Inflectra (CT-P13, infliximab-dyyb)<br><br>Celltrion       | Gecse et al [61], Gonczi et al [71, 72]                  | Bridging ELISA                       | Not performed             | n/a                                           | n/a                                          |
| Inflectra (CT-P13, infliximab-dyyb)<br><br>Celltrion       | Farkas et al [60]                                        | ELISA                                | Not performed             | Week 14                                       | n/a                                          |
| Inflectra (CT-P13, infliximab-dyyb)<br><br>Celltrion       | Farkas et al [59]                                        | ELISA                                | Not performed             | Week 8                                        | n/a                                          |
| Inflectra                                                  | Jahnsen et al [62]                                       | Automated assay (AutoDELFI platform) | Not performed             | Week 14                                       | n/a                                          |

| <b>Biosimilar / Manufacturer</b>                              | <b>Study</b>                          | <b>ADAb Assay</b>                      | <b>nAb Assay</b>                 | <b>Immunogenicity blood sample collection</b>                                                                              | <b>Differentiation between IgG subtypes?</b> |
|---------------------------------------------------------------|---------------------------------------|----------------------------------------|----------------------------------|----------------------------------------------------------------------------------------------------------------------------|----------------------------------------------|
| (CT-P13, infliximab-dyyb)<br><br>Celltrion                    |                                       |                                        |                                  |                                                                                                                            |                                              |
| Inflectra (CT-P13, infliximab-dyyb)<br><br>Celltrion          | Buer et al [58] and Høivik et al [73] | Automated assay (AutoDELFLIA platform) | Not performed                    | At each infusion                                                                                                           | n/a                                          |
| Inflectra, Remsima (CT-P13, infliximab-dyyb)<br><br>Celltrion | Smits et al [66, 75, 76]              | RIA                                    | Not performed                    | Baseline and Weeks 16, 52, and 104                                                                                         | n/a                                          |
| Inflectra/Remsima (CT-P13, infliximab-dyyb)<br><br>Celltrion  | Ben-Horin et al [57]                  | Anti-human $\lambda$ chain ELISA       | Competitive ligand-binding assay | Baseline only (cross-sectional case-control study)                                                                         | No                                           |
| Inflectra/Remsima (CT-P13, infliximab-dyyb)<br><br>Celltrion  | Kolar et al [64]                      | ELISA                                  | n/a                              | IFN to CT-P13 switch cohort (prospective): Weeks 0 and 56<br><br>TNFi-naïve CT-P13 cohort (retrospective): Weeks 14 and 46 | n/a                                          |
| Inflectra (CT-P13, infliximab-dyyb)<br><br>Celltrion          | Razanskaite et al [65]                | ELISA                                  | n/a                              | Before switch and after 3-5 doses of CT-P13                                                                                | n/a                                          |
| <b>Reference product: Rituximab</b>                           |                                       |                                        |                                  |                                                                                                                            |                                              |
| <b>Rheumatic diseases</b>                                     |                                       |                                        |                                  |                                                                                                                            |                                              |



| <b>Biosimilar / Manufacturer</b>  | <b>Study</b>                                                                      | <b>ADAb Assay</b>                                                                                                                                                                                                                | <b>nAb Assay</b>                                                                                                                                                             | <b>Immunogenicity blood sample collection</b>                         | <b>Differentiation between IgG subtypes?</b> |
|-----------------------------------|-----------------------------------------------------------------------------------|----------------------------------------------------------------------------------------------------------------------------------------------------------------------------------------------------------------------------------|------------------------------------------------------------------------------------------------------------------------------------------------------------------------------|-----------------------------------------------------------------------|----------------------------------------------|
| Truxima (CT-P10)<br>Celltrion     | CT-P10 1.1 (NCT01534884) [49, 82] and the extension CT-P10 1.3 (NCT01873443) [48] | ECL bridging assay with CT-P10 tags (sulfo-tag [ruthenium] and biotin)<br><br>Screening assay: labelled CT-P10<br>Confirmation assay: labelled + non-labeled CT-P10                                                              | CDC assay: binding of RTX or CT-P10 to CD20 of B-cells activates the complement system – nAbs inhibit this effect                                                            | Weeks 0, 24, and 48                                                   | n/a                                          |
| Truxima (CT-P10)<br>Celltrion     | CT-P10 3.2 (NCT02149121) [47, 68]                                                 | Based on info for trial CT-P10 1.1 (see the row above):<br>ECL bridging assay with CT-P10 tags (sulfo-tag [ruthenium] and biotin)<br><br>Screening assay: labelled CT-P10<br>Confirmation assay: labelled + non-labelled CT-P-10 | Based on info for trial CT-P10 1.1 (see the row above):<br>CDC assay: binding of RTX or CT-P10 to CD20 of B-cells activates the complement system – nAbs inhibit this effect | Weeks 0, 24, and 48                                                   | n/a                                          |
| Rixathon (GP2013)<br>Hexal/Sandoz | GP13-201 (NCT01274182) [50]                                                       | Affinity capture elution<br>ELISA                                                                                                                                                                                                | CDC assay                                                                                                                                                                    | Randomization and weeks 4, 16, 24, 38, and 52                         | n/a                                          |
| Hexal/Sandoz                      | GP13-302 (NCT02514772) [51]                                                       | Affinity capture elution<br>ELISA (multi-tiered)                                                                                                                                                                                 | Cell-based assay                                                                                                                                                             | Each study visit and when any AE was considered immune system-related | n/a                                          |
| PF-05280586<br>Pfizer             | REFLECTIONS B328-01 (NCT01526057) [52]                                            | ECL assays (assay for dosed product followed by cross-reactivity assay)                                                                                                                                                          | CDC assay                                                                                                                                                                    | Baseline and weeks 2, 4, 8, 12, and 24                                | n/a                                          |

| <b>Biosimilar / Manufacturer</b>                                                                                                                                                                                                                                                                                                                                                                                                                             | <b>Study</b>                           | <b>ADAb Assay</b>                                                       | <b>nAb Assay</b> | <b>Immunogenicity blood sample collection</b>                                                      | <b>Differentiation between IgG subtypes?</b> |
|--------------------------------------------------------------------------------------------------------------------------------------------------------------------------------------------------------------------------------------------------------------------------------------------------------------------------------------------------------------------------------------------------------------------------------------------------------------|----------------------------------------|-------------------------------------------------------------------------|------------------|----------------------------------------------------------------------------------------------------|----------------------------------------------|
|                                                                                                                                                                                                                                                                                                                                                                                                                                                              |                                        |                                                                         |                  |                                                                                                    |                                              |
| PF-05280586<br>Pfizer                                                                                                                                                                                                                                                                                                                                                                                                                                        | REFLECTIONS B328-04 (NCT01643928) [53] | ECL assays (assay for dosed product followed by cross-reactivity assay) | Cell-based assay | Predose on Days 1, 15 (Week 2), 85 (Week 12), and 169 (Week 24) during each of Courses 1, 2, and 3 | n/a                                          |
| ADAb, anti-drug antibody; ADA, adalimumab; ADCC, antibody-dependent cell-mediated cytotoxicity; AS, ankylosing spondylitis; BL, baseline; CDC, complement-dependent cytotoxicity; ECL, electrochemiluminescence; ELISA, enzyme-linked immunosorbent assay; ETN, etanercept; INF, infliximab; MTX, methotrexate; n/a, data not available; nAb, neutralizing antibody; RIA, radioimmunoassay; RP, reference product; RTX, rituximab; RA, rheumatoid arthritis. |                                        |                                                                         |                  |                                                                                                    |                                              |

**Table 2. Incidence of ADAb and nAb and the Effects of ADAb Formation on PK, PD, Efficacy, and Safety**

| Biosimilar /<br>Manufacturer                         | Participants          | cDMAR<br>D or<br>Previous<br>Therapy | Trial Registration<br>and Design                                                                                                                                   | Patients with ADABs<br>(% of total patients per<br>treatment group, [n <sub>1</sub> /N]x100)                                                                                                                                                                                                    |                                                                                                                                                                                                 | Patients with nAbs<br>(% of ADAB-positive patients<br>per treatment group,<br>[n <sub>2</sub> /n <sub>1</sub> ]x100)                                                                                                                      |                                                                                                                             | PK by ADAb<br>Status                                                                                                  | Effect of<br>ADABs on PD,<br>efficacy, and<br>safety<br>parameters |
|------------------------------------------------------|-----------------------|--------------------------------------|--------------------------------------------------------------------------------------------------------------------------------------------------------------------|-------------------------------------------------------------------------------------------------------------------------------------------------------------------------------------------------------------------------------------------------------------------------------------------------|-------------------------------------------------------------------------------------------------------------------------------------------------------------------------------------------------|-------------------------------------------------------------------------------------------------------------------------------------------------------------------------------------------------------------------------------------------|-----------------------------------------------------------------------------------------------------------------------------|-----------------------------------------------------------------------------------------------------------------------|--------------------------------------------------------------------|
|                                                      |                       |                                      |                                                                                                                                                                    | Reference<br>product                                                                                                                                                                                                                                                                            | Biosimilar                                                                                                                                                                                      | Reference<br>product                                                                                                                                                                                                                      | Biosimilar                                                                                                                  |                                                                                                                       |                                                                    |
| <b>Reference product: Adalimumab</b>                 |                       |                                      |                                                                                                                                                                    |                                                                                                                                                                                                                                                                                                 |                                                                                                                                                                                                 |                                                                                                                                                                                                                                           |                                                                                                                             |                                                                                                                       |                                                                    |
| <b>Healthy<br/>volunteers</b>                        |                       |                                      |                                                                                                                                                                    |                                                                                                                                                                                                                                                                                                 |                                                                                                                                                                                                 |                                                                                                                                                                                                                                           |                                                                                                                             |                                                                                                                       |                                                                    |
| Cyltezo<br>(BI 695501)<br><br>Boehriner<br>Ingelheim | Healthy<br>volunteers | n/a                                  | VOLTAIRE-PK<br>(NCT02045979)<br>[19]<br>N=327<br><br>Single-dose,<br>randomized (1:1:1)<br>trial of BI 695501,<br>US-ADL, and EU-<br>ADL with 10-week<br>follow-up | <b>Baseline</b><br>ADA-EU:<br>3.7% (4/108)<br><br>ADA-US:<br>2.8% (3/108)<br><br><b>Week 4</b><br>ADA-EU:<br>37.4%<br>(40/107)<br><br>ADA-US:<br>56.1%<br>(60/107)<br><br><b>Week 10</b><br>ADA-EU:<br>84.3%<br>(91/108)<br><br>ADA-US:<br>88.0%<br>(95/108)<br><br>denominator<br>N calculated | <b>Baseline</b><br>3.7% (4/108)<br><br><br><br><b>Week 4</b><br>46.7% (50/107)<br><br><br><br><b>Week 10</b><br>92.5% (99/107)<br><br>denominator N<br>calculated based<br>on n and %<br>values | <b>Baseline</b><br>ADA-EU:<br>50.0% (2/4)<br><br>ADA-US:<br>33.3% (1/3)<br><br><b>Week 4</b><br>ADA-EU:<br>22.5% (9/40)<br><br>ADA-US:<br>31.7% (19/60)<br><br><b>Week 10</b><br>ADA-EU:<br>69.2% (63/91)<br><br>ADA-US:<br>72.6% (69/95) | <b>Baseline</b><br>75.0% (3/4)<br><br><br><br><b>Week 4</b><br>24.0% (12/50)<br><br><br><br><b>Week 10</b><br>64.6% (64/99) | A decrease in<br>AUC <sub>0-inf, pred</sub><br>was observed<br>for patients<br>with high titer<br>values for<br>ADABs | n/a<br>(healthy<br>volunteers)                                     |

| Biosimilar /<br>Manufacturer                               | Participants          | cDMAR<br>D or<br>Previous<br>Therapy | Trial Registration<br>and Design                                                                                                                                                                                                                            | Patients with ADABs<br>(% of total patients per<br>treatment group, [n <sub>1</sub> /N]x100) |                                      | Patients with nAbs<br>(% of ADAB-positive patients<br>per treatment group,<br>[n <sub>2</sub> /n <sub>1</sub> ]x100) |                                      | PK by ADAB<br>Status                                                                                                                                                                                                                                                                             | Effect of<br>ADABs on PD,<br>efficacy, and<br>safety<br>parameters |
|------------------------------------------------------------|-----------------------|--------------------------------------|-------------------------------------------------------------------------------------------------------------------------------------------------------------------------------------------------------------------------------------------------------------|----------------------------------------------------------------------------------------------|--------------------------------------|----------------------------------------------------------------------------------------------------------------------|--------------------------------------|--------------------------------------------------------------------------------------------------------------------------------------------------------------------------------------------------------------------------------------------------------------------------------------------------|--------------------------------------------------------------------|
|                                                            |                       |                                      |                                                                                                                                                                                                                                                             | Reference<br>product                                                                         | Biosimilar                           | Reference<br>product                                                                                                 | Biosimilar                           |                                                                                                                                                                                                                                                                                                  |                                                                    |
|                                                            |                       |                                      |                                                                                                                                                                                                                                                             | based on n<br>and % values                                                                   |                                      |                                                                                                                      |                                      |                                                                                                                                                                                                                                                                                                  |                                                                    |
| Imraldi<br>(SB5)<br><br>Samsung<br>Bioepis                 | Healthy<br>volunteers | n/a                                  | SB5-G11-NHV<br>(NCT02144714)<br>[20]<br><br>Randomized<br>(1:1:1), single-<br>blind, single-dose,<br>3-arm trial of<br>ADA-EU, ADA-<br>US, and SB5<br>N=189<br><br>ADAB tests were<br>performed at days<br>1 (predose), 15<br>(Week 2), and 71<br>(Week 10) | <b>Overall:</b><br><br>ADA-EU:<br>95.2%<br>(60/63)<br><br>ADA-US:<br>100% (63/63)            | <b>Overall:</b><br><br>98.4% (62/63) | <b>Overall:</b><br><br>ADA-EU:<br>80.0% (48/60)<br><br>ADA-US:<br>82.5% (52/63)                                      | <b>Overall:</b><br><br>79.0% (49/62) | 98% of<br>participants<br>were ADAB-<br>positive;<br>higher ADAB<br>titre was<br>associated<br>with lower<br>AUC <sub>inf</sub> and<br>AUC <sub>last</sub> , but<br>also with<br>higher drug<br>clearance, in a<br>way that was<br>comparable<br>between SB5<br>and the<br>reference<br>products | n/a<br>(healthy<br>volunteers)                                     |
| Solymbic<br>(ABP 501,<br>adalimumab-<br>atto)<br><br>Amgen | Healthy<br>volunteers | -                                    | EudraCT 2012-<br>000785-37 [21]<br><br>Randomized<br>(1:1:1), single-<br>blind, single-dose,<br>3-arm, parallel-<br>group trial of<br>ADA-US, ADA-<br>EU, or ABP 501<br>N=203                                                                               | <b>Overall:</b><br><br>ADA-EU:<br>67.2%<br>(45/67)<br><br>ADA-US:<br>55.1%<br>(38/69)        | <b>Overall:</b><br><br>53.7% (36/67) | <b>Overall:</b><br><br>ADA-EU:<br>31.1% (14/45)<br><br>ADA-US:<br>39.5% (15/38)                                      | <b>Overall:</b><br><br>33.3% (12/36) | AUC <sub>inf</sub> 20-<br>30% lower in<br>ADAB-<br>positive than<br>ADAB-<br>negative<br>patients<br><br>t <sub>1/2</sub> 50%<br>shorter in<br>ADAB-                                                                                                                                             | n/a<br>(healthy<br>volunteers)                                     |

| Biosimilar /<br>Manufacturer                                | Participants       | cDMAR<br>D or<br>Previous<br>Therapy | Trial Registration<br>and Design                                                                                                                                       | Patients with ADABs<br>(% of total patients per<br>treatment group, [n <sub>1</sub> /N]x100)                                                                                                                                                                           |                                                                                                                                                                              | Patients with nAbs<br>(% of ADAB-positive patients<br>per treatment group,<br>[n <sub>2</sub> /n <sub>1</sub> ]x100)                                                                                                                                                       |                                                                                                                                                       | PK by ADAB<br>Status                                                                                                                                                                      | Effect of<br>ADABs on PD,<br>efficacy, and<br>safety<br>parameters |
|-------------------------------------------------------------|--------------------|--------------------------------------|------------------------------------------------------------------------------------------------------------------------------------------------------------------------|------------------------------------------------------------------------------------------------------------------------------------------------------------------------------------------------------------------------------------------------------------------------|------------------------------------------------------------------------------------------------------------------------------------------------------------------------------|----------------------------------------------------------------------------------------------------------------------------------------------------------------------------------------------------------------------------------------------------------------------------|-------------------------------------------------------------------------------------------------------------------------------------------------------|-------------------------------------------------------------------------------------------------------------------------------------------------------------------------------------------|--------------------------------------------------------------------|
|                                                             |                    |                                      |                                                                                                                                                                        | Reference<br>product                                                                                                                                                                                                                                                   | Biosimilar                                                                                                                                                                   | Reference<br>product                                                                                                                                                                                                                                                       | Biosimilar                                                                                                                                            |                                                                                                                                                                                           |                                                                    |
|                                                             |                    |                                      | ADAB tests were performed at day 1 (predose), and at Weeks 2, 4, and 9                                                                                                 |                                                                                                                                                                                                                                                                        |                                                                                                                                                                              |                                                                                                                                                                                                                                                                            |                                                                                                                                                       | positive than ADAB-negative patients                                                                                                                                                      |                                                                    |
| Hulio (FKB327)<br><br>Fujifilm Kyowa Kirin Biologics, Mylan | Healthy volunteers | -                                    | FKB327-001, EudraCT 2012-005140-23 [22, 33] N=180<br><br>Randomized (1:1:1), double-blind, single-dose trial of ADA-EU, ADA-US, and FKB327 with a follow-up of 9 weeks | <b>Baseline:</b><br>ADA-EU<br>5.0% (3/60)<br><br>ADA-US<br>5.0% (3/60)<br><br><b>Week 2:</b><br>ADA-EU<br>31.7% (19/60)<br><br>ADA-US<br>25.0% (15/60)<br><br><b>Week 4:</b><br>ADA-EU<br>31.7% (19/60)<br><br>ADA-US<br>30.0% (18/60)<br><br><b>Week 9:</b><br>ADA-EU | <b>Baseline:</b><br>5.0% (3/60)<br><br><br><br><b>Week 2:</b><br>35.0% (21/60)<br><br><br><br><b>Week 4:</b><br>33.9% (20/60)<br><br><br><br><b>Week 9:</b><br>69.5% (41/59) | <b>Baseline:</b><br>ADA-EU<br>0<br><br>ADA-US<br>0<br><br><b>Week 2:</b><br>ADA-EU<br>0<br><br>ADA-US<br>0<br><br><b>Week 4:</b><br>ADA-EU<br>52.6% (10/19)<br><br>ADA-US<br>55.6% (10/18)<br><br><b>Week 9:</b><br>ADA-EU<br>81.8% (36/44)<br><br>ADA-US<br>81.0% (34/42) | <b>Baseline:</b><br>0<br><br><br><br><b>Week 2:</b><br>0<br><br><br><br><b>Week 4:</b><br>10.0% (2/20)<br><br><br><br><b>Week 9:</b><br>85.4% (35/41) | In all groups, higher ADAB titre was associated with lower AUC <sub>0-∞</sub> and shorter t <sub>1/2</sub><br><br>There was no clear relationship between ADAB titre and C <sub>max</sub> | n/a (healthy volunteers)                                           |

| Biosimilar /<br>Manufacturer                                    | Participants          | cDMAR<br>D or<br>Previous<br>Therapy | Trial Registration<br>and Design                                                                                                                                                                                      | Patients with ADABs<br>(% of total patients per<br>treatment group, $[n_1/N] \times 100$ )                                              |                                                                            | Patients with nAbs<br>(% of ADAB-positive patients<br>per treatment group,<br>$[n_2/n_1] \times 100$ ) |                                                                            | PK by ADAB<br>Status                                                                                                                         | Effect of<br>ADABs on PD,<br>efficacy, and<br>safety<br>parameters |
|-----------------------------------------------------------------|-----------------------|--------------------------------------|-----------------------------------------------------------------------------------------------------------------------------------------------------------------------------------------------------------------------|-----------------------------------------------------------------------------------------------------------------------------------------|----------------------------------------------------------------------------|--------------------------------------------------------------------------------------------------------|----------------------------------------------------------------------------|----------------------------------------------------------------------------------------------------------------------------------------------|--------------------------------------------------------------------|
|                                                                 |                       |                                      |                                                                                                                                                                                                                       | Reference<br>product                                                                                                                    | Biosimilar                                                                 | Reference<br>product                                                                                   | Biosimilar                                                                 |                                                                                                                                              |                                                                    |
|                                                                 |                       |                                      |                                                                                                                                                                                                                       | 73.3%<br>(44/60)<br><br>ADA-US<br>70.0%<br>(42/60)<br><br>(insufficient<br>drug<br>tolerance<br>limit; many<br>inconclusive<br>samples) | (insufficient drug<br>tolerance limit;<br>many<br>inconclusive<br>samples) | (insufficient<br>drug tolerance<br>limit; many<br>inconclusive<br>samples)                             | (insufficient<br>drug tolerance<br>limit; many<br>inconclusive<br>samples) |                                                                                                                                              |                                                                    |
| Hyrimoz<br>(GP2017,<br>adalimumab-<br>adaz)<br><br>Hexal/Sandoz | Healthy<br>volunteers | n/a                                  | GP17-101, GP17-<br>104 [23]<br><br>Double-blind,<br>parallel-group<br>studies in healthy<br>men (GP17-104) or<br>men and women<br>(GP17-101)<br>randomized to<br>receive GP2017,<br>ADA-US, or ADA-<br>EU for 72 days | n/a                                                                                                                                     | n/a                                                                        | n/a                                                                                                    | n/a                                                                        | Smaller AUC <sub>0-<br/>last</sub> and AUC <sub>0-<br/>inf</sub> in patients<br>in ADAB-<br>positive vs<br>ADAB-<br>negative<br>participants | n/a<br><br>(healthy<br>volunteers)                                 |
| MSB11022<br><br>Merck                                           | Healthy<br>volunteers | -                                    | EMR200588-001<br>(NCT03014947)<br>[24]<br>N=237                                                                                                                                                                       | <b>Week 10:</b><br><br>ADA-EU:<br>83.5%<br>(66/79)                                                                                      | <b>Week 10:</b><br><br>82.1% (64/78)                                       | n/a                                                                                                    | n/a                                                                        | ADAB-<br>positive<br>patients had<br>34-45% lower<br>AUC <sub>0-inf</sub> , 13-<br>25% lower                                                 | n/a<br><br>(healthy<br>volunteers)                                 |

| Biosimilar /<br>Manufacturer                         | Participants | cDMAR<br>D or<br>Previous<br>Therapy | Trial Registration<br>and Design                                                                                                                                                                                                                                                                               | Patients with ADABs<br>(% of total patients per<br>treatment group, [n <sub>1</sub> /N]x100)                                                                                                   |                                                                                                                                                                                                                                                             | Patients with nAbs<br>(% of ADAB-positive patients<br>per treatment group,<br>[n <sub>2</sub> /n <sub>1</sub> ]x100)                                                                |                                                                                                                                                                                                                                                   | PK by ADAB<br>Status                                                                                      | Effect of<br>ADABs on PD,<br>efficacy, and<br>safety<br>parameters                                                                                                                                                                                                                           |
|------------------------------------------------------|--------------|--------------------------------------|----------------------------------------------------------------------------------------------------------------------------------------------------------------------------------------------------------------------------------------------------------------------------------------------------------------|------------------------------------------------------------------------------------------------------------------------------------------------------------------------------------------------|-------------------------------------------------------------------------------------------------------------------------------------------------------------------------------------------------------------------------------------------------------------|-------------------------------------------------------------------------------------------------------------------------------------------------------------------------------------|---------------------------------------------------------------------------------------------------------------------------------------------------------------------------------------------------------------------------------------------------|-----------------------------------------------------------------------------------------------------------|----------------------------------------------------------------------------------------------------------------------------------------------------------------------------------------------------------------------------------------------------------------------------------------------|
|                                                      |              |                                      |                                                                                                                                                                                                                                                                                                                | Reference<br>product                                                                                                                                                                           | Biosimilar                                                                                                                                                                                                                                                  | Reference<br>product                                                                                                                                                                | Biosimilar                                                                                                                                                                                                                                        |                                                                                                           |                                                                                                                                                                                                                                                                                              |
|                                                      |              |                                      | Randomized<br>(1:1:1), double-<br>blind, single-dose<br>trial of ADA-EU,<br>ADA-US, and<br>MSB11022 with a<br>follow-up of 10<br>weeks                                                                                                                                                                         | ADA-US:<br>81.3%<br>(65/80)                                                                                                                                                                    |                                                                                                                                                                                                                                                             |                                                                                                                                                                                     |                                                                                                                                                                                                                                                   | C <sub>max</sub> , and 44-<br>57% shorter<br>t <sub>1/2</sub>                                             |                                                                                                                                                                                                                                                                                              |
| <b>Rheumatic<br/>diseases</b>                        |              |                                      |                                                                                                                                                                                                                                                                                                                |                                                                                                                                                                                                |                                                                                                                                                                                                                                                             |                                                                                                                                                                                     |                                                                                                                                                                                                                                                   |                                                                                                           |                                                                                                                                                                                                                                                                                              |
| Cyltezo<br>(BI 695501)<br><br>Boehriner<br>Ingelheim | RA           | MTX                                  | VOLTAIRE-RA<br>(NCT02137226)<br>[30]<br>N=645<br><br>Randomized (1:1)<br>double-blind<br>treatment with BI<br>695501 or ADA<br><br>At Week 24, ADA-<br>treated patients<br>were re-<br>randomized (1:1)<br>for an additional 24<br>weeks of treatment<br>with<br>BI 695501 or ADA<br>(follow-up to week<br>58) | <b>Baseline:</b><br>6.5%<br>(21/321)<br><br><b>Week 24:</b><br>47.8%<br>(144/301)<br><br><b>Week 48:</b><br>ADA/ADA<br>49.6%<br>(69/139)<br><br><b>Week 58:</b><br>ADA/ADA<br>58.3%<br>(21/36) | <b>Baseline:</b><br>3.4% (11/324)<br><br><b>Week 24:</b><br>43.2% (127/294)<br><br><b>Week 48:</b><br>695501/<br>695501<br>41.8% (118/282)<br><br>ADL/<br>695501<br>36.2% (50/138)<br><br><b>Week 58:</b><br>695501/<br>695501<br>44.7% (21/47)<br><br>ADA/ | <b>Baseline:</b><br>76.2% (16/21)<br><br><b>Week 24:</b><br>42.4%<br>(61/144)<br><br><b>Week 48:</b><br>ADA/ADA<br>43.5% (30/69)<br><br><b>Week 58:</b><br>ADA/ADA<br>66.7% (14/21) | <b>Baseline:</b><br>81.8% (9/11)<br><br><b>Week 24:</b><br>37.8%<br>(48/127)<br><br><b>Week 48:</b><br>695501/<br>695501<br>45.8%<br>(54/118)<br><br>ADA/<br>695501<br>42.0% (21/50)<br><br><b>Week 58:</b><br>695501/<br>695501<br>76.2% (16/21) | ADAb-<br>positive<br>patients had<br>lower drug<br>plasma<br>concentration<br>than ADAB-<br>negative ones | At Week 24,<br>ADAb-positive<br>patients had a<br>lower ACR20<br>response rate<br>than ADAB-<br>negative ones:<br><br>BI 695501:<br>69.3% vs 78.4%<br><br>ADA:<br>64.6% vs 71.3%<br><br>In both<br>treatment<br>groups, ACR20<br>response rate<br>decreased with<br>the higher<br>ADAb titre |

| Biosimilar /<br>Manufacturer               | Participants | cDMARD or<br>Previous<br>Therapy | Trial Registration<br>and Design                                                                                                                                                                                                                                    | Patients with ADABs<br>(% of total patients per<br>treatment group, [n <sub>1</sub> /N]x100)                                                                                                                                                                   |                                                                                                                                                                                                                                                                                                                     | Patients with nAbs<br>(% of ADAB-positive patients<br>per treatment group,<br>[n <sub>2</sub> /n <sub>1</sub> ]x100)         |                                                                                                                              | PK by ADAB<br>Status                                                                                                                 | Effect of<br>ADABs on PD,<br>efficacy, and<br>safety<br>parameters                                                                                                                                                                                                                                                                                                                                        |
|--------------------------------------------|--------------|----------------------------------|---------------------------------------------------------------------------------------------------------------------------------------------------------------------------------------------------------------------------------------------------------------------|----------------------------------------------------------------------------------------------------------------------------------------------------------------------------------------------------------------------------------------------------------------|---------------------------------------------------------------------------------------------------------------------------------------------------------------------------------------------------------------------------------------------------------------------------------------------------------------------|------------------------------------------------------------------------------------------------------------------------------|------------------------------------------------------------------------------------------------------------------------------|--------------------------------------------------------------------------------------------------------------------------------------|-----------------------------------------------------------------------------------------------------------------------------------------------------------------------------------------------------------------------------------------------------------------------------------------------------------------------------------------------------------------------------------------------------------|
|                                            |              |                                  |                                                                                                                                                                                                                                                                     | Reference<br>product                                                                                                                                                                                                                                           | Biosimilar                                                                                                                                                                                                                                                                                                          | Reference<br>product                                                                                                         | Biosimilar                                                                                                                   |                                                                                                                                      |                                                                                                                                                                                                                                                                                                                                                                                                           |
|                                            |              |                                  |                                                                                                                                                                                                                                                                     |                                                                                                                                                                                                                                                                | 695501<br>41.2% (14/34)                                                                                                                                                                                                                                                                                             |                                                                                                                              | ADA/<br>695501<br>71.4% (10/14)                                                                                              |                                                                                                                                      |                                                                                                                                                                                                                                                                                                                                                                                                           |
| Imraldi<br>(SB5)<br><br>Samsung<br>Bioepis | RA           | MTX                              | SB5-G31-RA<br>(NCT02167139)<br>[31, 70]<br>N=544<br><br>Randomized (1:1)<br>double-blind<br>treatment with SB5<br>or ADA<br><br>At Week 24, ADA-<br>treated patients<br>were re-<br>randomized 1:1 for<br>an additional 28<br>weeks of treatment<br>with SB5 or ADA | <b>Weeks 1-24<br/>(emergent):</b><br>31.4%<br>(82/261)<br><br><b>Weeks 1-24<br/>(boosted):</b><br>50.0% (4/8)<br><br><b>Weeks 25-52<br/>(emergent):</b><br>ADA/ADA<br>12.6%<br>(11/87)<br><br><b>Weeks 25-52<br/>(boosted):</b><br>ADA/ADA<br>30.8%<br>(12/39) | <b>Weeks 1-24<br/>(emergent):</b><br>32.4% (80/247)<br><br><b>Weeks 1-24<br/>(boosted):</b><br>42.1% (8/19)<br><br><b>Weeks 25-52<br/>(emergent):</b><br>SB5/SB5<br>5.6% (9/160)<br>ADLADA/SB5<br>6.3% (5/80)<br><br><b>Weeks 25-52<br/>(emergent):</b><br>SB5/SB5<br>33.0% (31/94)<br><br>ADA/SB5<br>35.6% (16/45) | <b>Weeks 1-24<br/>(overall):</b><br>~50%<br><br><b>Weeks 1-24<br/>(emergent):</b><br>14.6%<br><br><b>Weeks 25-52:</b><br>n/a | <b>Weeks 1-24<br/>(overall):</b><br>~50%<br><br><b>Weeks 1-24<br/>(emergent):</b><br>13.6%<br><br><b>Weeks 25-52:</b><br>n/a | Lower C <sub>trough</sub><br>in ADAB-<br>positive than<br>ADAB-<br>negative<br>patients,<br>regardless of<br>treatment<br>assignment | <b>Weeks 1-24:</b><br>Comparable<br>ACR20<br>responses<br>between<br>ADAB-positive<br>and –negative<br>patients,<br>according to<br>Weinblatt et al<br>[31], but there<br>was a<br>significant<br>difference in<br>Week 24<br>ACR20<br>according to<br>SB5 EPAR<br>(ADA, 71%;<br>SB5, 58%).<br><br>There was no<br>significant<br>difference in<br>ACR20<br>responses in<br>patients with<br>nAbs (EPAR). |



| Biosimilar /<br>Manufacturer | Participants | cDMAR<br>D or<br>Previous<br>Therapy | Trial Registration<br>and Design | Patients with ADABs<br>(% of total patients per<br>treatment group, $[n_1/N] \times 100$ ) |            | Patients with nAbs<br>(% of ADAB-positive patients<br>per treatment group,<br>$[n_2/n_1] \times 100$ ) |            | PK by ADAB<br>Status | Effect of<br>ADABs on PD,<br>efficacy, and<br>safety<br>parameters                                                                                                                                                                                                                                                                                                                                      |
|------------------------------|--------------|--------------------------------------|----------------------------------|--------------------------------------------------------------------------------------------|------------|--------------------------------------------------------------------------------------------------------|------------|----------------------|---------------------------------------------------------------------------------------------------------------------------------------------------------------------------------------------------------------------------------------------------------------------------------------------------------------------------------------------------------------------------------------------------------|
|                              |              |                                      |                                  | Reference<br>product                                                                       | Biosimilar | Reference<br>product                                                                                   | Biosimilar |                      |                                                                                                                                                                                                                                                                                                                                                                                                         |
|                              |              |                                      |                                  |                                                                                            |            |                                                                                                        |            |                      | <p><b>Switching phase (Weeks 25-52):</b><br/>ACR response rate (ACR20, ACR50, and ACR70), EULAR response rate (good and moderate), and proportions of patients with LDA or remission (DAS28, SDAI, or CDAI) had a trend toward decreased efficacy in ADAB-positive patients, versus ADAB-negative patients</p> <p>Post-switch (weeks 24-52), mean DAS28, SDAI, and CDAI values tended to improve in</p> |

| Biosimilar /<br>Manufacturer                                         | Participants                            | cDMAR<br>D or<br>Previous<br>Therapy | Trial Registration<br>and Design                                                                                                                                           | Patients with ADABs<br>(% of total patients per<br>treatment group, [n <sub>1</sub> /N]x100)                                                                                                                     |                                                                                                                                                                                                     | Patients with nAbs<br>(% of ADAB-positive patients<br>per treatment group,<br>[n <sub>2</sub> /n <sub>1</sub> ]x100)                                                                   |                                                                                                                                                                                        | PK by ADAB<br>Status | Effect of<br>ADABs on PD,<br>efficacy, and<br>safety<br>parameters                                            |
|----------------------------------------------------------------------|-----------------------------------------|--------------------------------------|----------------------------------------------------------------------------------------------------------------------------------------------------------------------------|------------------------------------------------------------------------------------------------------------------------------------------------------------------------------------------------------------------|-----------------------------------------------------------------------------------------------------------------------------------------------------------------------------------------------------|----------------------------------------------------------------------------------------------------------------------------------------------------------------------------------------|----------------------------------------------------------------------------------------------------------------------------------------------------------------------------------------|----------------------|---------------------------------------------------------------------------------------------------------------|
|                                                                      |                                         |                                      |                                                                                                                                                                            | Reference<br>product                                                                                                                                                                                             | Biosimilar                                                                                                                                                                                          | Reference<br>product                                                                                                                                                                   | Biosimilar                                                                                                                                                                             |                      |                                                                                                               |
|                                                                      |                                         |                                      |                                                                                                                                                                            |                                                                                                                                                                                                                  |                                                                                                                                                                                                     |                                                                                                                                                                                        |                                                                                                                                                                                        |                      | ADAB-negative patients and worsen in ADAB-positive patients                                                   |
| Solymbic<br>(ABP 501,<br>adalimumab-<br>atto)<br><br>Amgen           | RA                                      | MTX                                  | 20120262<br>(NCT01970475)<br>[32]<br>N=526<br><br>Randomized (1:1)<br>double-blind<br>treatment with<br>ABP 501 or ADA<br>for 24 weeks, with<br>follow-up until<br>Week 26 | <b>Baseline:</b><br>2.3% (6/262)<br><br><b>Week 4:</b><br>17.2%<br>(45/262)<br><br><b>Week 12:</b><br>23.7%<br>(62/262)<br><br><b>Week 26:</b><br>35.1%<br>(92/262)<br><br><b>Overall:</b><br>38.2%<br>(100/262) | <b>Baseline:</b><br>1.9 (5/264)<br><br><b>Week 4:</b><br>18.9% (50/264)<br><br><b>Week 12:</b><br>23.5% (62/264)<br><br><b>Week 26:</b><br>31.8% (84/264)<br><br><b>Overall:</b><br>38.3% (101/264) | <b>Baseline:</b><br>0<br><br><b>Week 4:</b><br>8.9% (4/45)<br><br><b>Week 12:</b><br>16.1% (10/62)<br><br><b>Week 26:</b><br>28.3% (26/92)<br><br><b>Overall:</b><br>29.0%<br>(29/100) | <b>Baseline:</b><br>0<br><br><b>Week 4:</b><br>10.0% (5/50)<br><br><b>Week 12:</b><br>12.9% (8/62)<br><br><b>Week 26:</b><br>22.6% (19/84)<br><br><b>Overall:</b><br>23.8%<br>(24/101) | n/a                  | In both treatment groups, similar proportions of ADAB-positive and -negative patients achieved ACR20 response |
| Hulio<br>(FKB327)<br><br>Fujifilm Kyowa<br>Kirin Biologics,<br>Mylan | RA,<br>inadequate<br>response to<br>MTX | MTX                                  | FKB327-002,<br>ARABESC<br>(NCT02260791)<br>[33]<br>N=728                                                                                                                   | <b>Baseline:</b><br>5.3%<br>(17/321)<br><br><b>Week 2:</b><br>12.1%<br>(39/321)                                                                                                                                  | <b>Baseline:</b><br>3.7% (12/324)<br><br><b>Week 2:</b><br>9.9% (32/324)<br><br><b>Week 4:</b>                                                                                                      | <b>Baseline:</b><br>82.4% (14/17)<br><br><b>Week 2:</b><br>76.9% (30/39)<br><br><b>Week 4:</b>                                                                                         | <b>Baseline:</b><br>66.7% (8/12)<br><br><b>Week 2:</b><br>84.4% (27/32)<br><br><b>Week 4:</b>                                                                                          | n/a                  | For both ADA and FKB327, there was a decrease in efficacy associated with an increase in                      |

| Biosimilar /<br>Manufacturer                                         | Participants                            | cDMAR<br>D or<br>Previous<br>Therapy | Trial Registration<br>and Design                                                                                                                                                                                                                              | Patients with ADABs<br>(% of total patients per<br>treatment group, [n <sub>1</sub> /N]x100)                                   |                                                                                                                                                                                                    | Patients with nAbs<br>(% of ADAB-positive patients<br>per treatment group,<br>[n <sub>2</sub> /n <sub>1</sub> ]x100) |                                                                                                                                                                                          | PK by ADAB<br>Status | Effect of<br>ADABs on PD,<br>efficacy, and<br>safety<br>parameters                                                                                                                                                                                 |
|----------------------------------------------------------------------|-----------------------------------------|--------------------------------------|---------------------------------------------------------------------------------------------------------------------------------------------------------------------------------------------------------------------------------------------------------------|--------------------------------------------------------------------------------------------------------------------------------|----------------------------------------------------------------------------------------------------------------------------------------------------------------------------------------------------|----------------------------------------------------------------------------------------------------------------------|------------------------------------------------------------------------------------------------------------------------------------------------------------------------------------------|----------------------|----------------------------------------------------------------------------------------------------------------------------------------------------------------------------------------------------------------------------------------------------|
|                                                                      |                                         |                                      |                                                                                                                                                                                                                                                               | Reference<br>product                                                                                                           | Biosimilar                                                                                                                                                                                         | Reference<br>product                                                                                                 | Biosimilar                                                                                                                                                                               |                      |                                                                                                                                                                                                                                                    |
|                                                                      |                                         |                                      | Randomized (1:1),<br>double-blind, 24-<br>week trial of ADA-<br>US and FKB327                                                                                                                                                                                 | <b>Week 4:</b><br>35.6%<br>(114/320)<br><br><b>Week 12:</b><br>52.5%<br>(168/320)<br><br><b>Week 24:</b><br>59.4%<br>(190/320) | 38.8% (125/322)<br><br><b>Week 12:</b><br>57.2% (183/320)<br><br><b>Week 24:</b><br>62.0% (201/324)                                                                                                | 93.0%<br>(106/114)<br><br><b>Week 12:</b><br>98.2%<br>(165/168)<br><br><b>Week 24:</b><br>99.5%<br>(189/190)         | 93.6%<br>(117/125)<br><br><b>Week 12:</b><br>98.9%<br>(181/183)<br><br><b>Week 24:</b><br>98.5%<br>(198/201)                                                                             |                      | ADAB/nAb<br>incidence<br><br>For both ADA<br>and FKB327,<br>presence of<br>ADABs/nAbs<br>was associated<br>with a slight<br>increase in<br>treatment-<br>emergent<br>hypersensitivity<br>adverse events<br>(with very low<br>overall<br>incidence) |
| Hulio<br>(FKB327)<br><br>Fujifilm Kyowa<br>Kirin Biologics,<br>Mylan | RA,<br>inadequate<br>response to<br>MTX | MTX                                  | FKB327-003,<br>ARABESC-OLE<br>(NCT02405780)<br>[33]<br>N=645<br><br>Open-label<br>extension of<br>FKB327-002; in<br>Period 1, patients<br>in each treatment<br>group were re-<br>randomized (2:1)<br>to continue or<br>switch treatments;<br>in Period 2, all | <b>Period 1</b><br><br><b>Week 36:</b><br>50.5%<br>(102/202)<br><br><b>Week 48:</b>                                            | <b>Period 1</b><br><br><b>Week 36:</b><br>FKB327/<br>FKB327<br>54.0% (109/202)<br><br>FKB327/ADA<br>58.3% (60/103)<br><br>ADA/FKB327<br>52.4% (54/103)<br><br><b>Week 48:</b><br>FKB327/<br>FKB327 | <b>Period 1</b><br><br><b>Week 36:</b><br>100%<br>(102/102)<br><br><b>Week 48:</b>                                   | <b>Period 1</b><br><br><b>Week 36:</b><br>FKB327/<br>FKB327<br>99.1%<br>(108/109)<br><br>FKB327/ADA<br>100% (60/60)<br><br>ADA/FKB327<br>98.1% (53/54)<br><br><b>Week 48:</b><br>FKB327/ | n/a                  | Presence of<br>ADABs/nAbs<br>was associated<br>with a slight<br>increase in<br>treatment-<br>emergent<br>hypersensitivity<br>adverse events<br>(with very low<br>overall<br>incidence)                                                             |

| Biosimilar /<br>Manufacturer | Participants | cDMAR<br>D or<br>Previous<br>Therapy | Trial Registration<br>and Design                             | Patients with ADABs<br>(% of total patients per<br>treatment group, [n <sub>1</sub> /N] $\times$ 100) |                                                                                                                                                                                                                                                                                                                                                                                                    | Patients with nAbs<br>(% of ADAB-positive patients<br>per treatment group,<br>[n <sub>2</sub> /n <sub>1</sub> ] $\times$ 100) |                                                                                                                                                                                                                                                                                                                                    | PK by ADAB<br>Status | Effect of<br>ADABs on PD,<br>efficacy, and<br>safety<br>parameters |
|------------------------------|--------------|--------------------------------------|--------------------------------------------------------------|-------------------------------------------------------------------------------------------------------|----------------------------------------------------------------------------------------------------------------------------------------------------------------------------------------------------------------------------------------------------------------------------------------------------------------------------------------------------------------------------------------------------|-------------------------------------------------------------------------------------------------------------------------------|------------------------------------------------------------------------------------------------------------------------------------------------------------------------------------------------------------------------------------------------------------------------------------------------------------------------------------|----------------------|--------------------------------------------------------------------|
|                              |              |                                      |                                                              | Reference<br>product                                                                                  | Biosimilar                                                                                                                                                                                                                                                                                                                                                                                         | Reference<br>product                                                                                                          | Biosimilar                                                                                                                                                                                                                                                                                                                         |                      |                                                                    |
|                              |              |                                      | patients received<br>FKB327 for an<br>additional 48<br>weeks | 50.8%<br>(101/199)                                                                                    | 50.8% (100/197)<br><br>FKB327/ADA<br>58.0% (58/100)<br><br>ADA/FKB327<br>49.0% (47/96)<br><br><b>Period 2</b><br>(includes<br>sequences<br>FKB327/<br>FKB327/<br>FKB327,<br><br>FKB327/ADA/<br>FKB327,<br><br>ADA/ FKB327/<br>FKB327,<br>and<br>ADA/ADA/FKB<br>327)<br><br><b>Week 54:</b><br>52.5% (299/569)<br><br><b>Week 78:</b><br>49.8% (271/544)<br><br><b>Week 100:</b><br>48.4% (252/521) | 98.0%<br>(99/101)                                                                                                             | FKB327<br>100%<br>(100/100)<br><br>FKB327/ADA<br>98.3% (57/58)<br><br>ADA/FKB327<br>100% (47/47)<br><br><b>Period 2</b><br>(includes<br>sequences<br>FKB327/<br>FKB327/<br>FKB327,<br><br>FKB327/ADA<br>/ FKB327,<br><br>ADA/<br>FKB327/<br>FKB327,<br><br>and<br>ADA/ADA/F<br>KB327)<br><br><b>Week 54:</b><br>99.0%<br>(296/299) |                      |                                                                    |

| Biosimilar /<br>Manufacturer | Participants                            | cDMAR<br>D or<br>Previous<br>Therapy | Trial Registration<br>and Design                                                                                                                                                                                                                                                                                                                                                                                                                 | Patients with ADABs<br>(% of total patients per<br>treatment group, [n <sub>1</sub> /N]x100) |                                                                              | Patients with nAbs<br>(% of ADAB-positive patients<br>per treatment group,<br>[n <sub>2</sub> /n <sub>1</sub> ]x100) |                                                                                     | PK by ADAB<br>Status                                                                                                                                                     | Effect of<br>ADABs on PD,<br>efficacy, and<br>safety<br>parameters |
|------------------------------|-----------------------------------------|--------------------------------------|--------------------------------------------------------------------------------------------------------------------------------------------------------------------------------------------------------------------------------------------------------------------------------------------------------------------------------------------------------------------------------------------------------------------------------------------------|----------------------------------------------------------------------------------------------|------------------------------------------------------------------------------|----------------------------------------------------------------------------------------------------------------------|-------------------------------------------------------------------------------------|--------------------------------------------------------------------------------------------------------------------------------------------------------------------------|--------------------------------------------------------------------|
|                              |                                         |                                      |                                                                                                                                                                                                                                                                                                                                                                                                                                                  | Reference<br>product                                                                         | Biosimilar                                                                   | Reference<br>product                                                                                                 | Biosimilar                                                                          |                                                                                                                                                                          |                                                                    |
|                              |                                         |                                      |                                                                                                                                                                                                                                                                                                                                                                                                                                                  |                                                                                              |                                                                              |                                                                                                                      | <b>Week 78:</b><br>98.2%<br>(266/271)<br><br><b>Week 100:</b><br>99.2%<br>(250/252) |                                                                                                                                                                          |                                                                    |
| PF-06410293<br><br>Pfizer    | RA,<br>inadequate<br>response to<br>MTX | MTX                                  | REFLECTIONS<br>B538-02<br>(NCT02480153)<br>[34]<br>N=597<br><br>Period 1 (Weeks 0-<br>26): Randomized<br>(1:1) double-blind<br>treatment with<br>ADA (EU) or PF-<br>06410293<br>Period 2 (Weeks<br>27-52): Patients<br>treated with PF-<br>06410293 in Period<br>1 continue<br>treatment; patients<br>initially<br>randomized to<br>ADA-EU are re-<br>randomized (1:1)<br>to PF-06410293 or<br>ADA-EU<br>Period 3 (Weeks<br>53-78): All patients | <b>Week 26:</b><br>43.5%<br>(130/299)<br><br><b>Overall:</b><br>50.5%<br>(151/299)           | <b>Week 26:</b><br>37.7% (112/297)<br><br><b>Overall:</b><br>44.4% (132/297) | <b>Week 26:</b><br>23.1%<br>(30/130)<br><br><b>Overall:</b><br>27.8%<br>(42/151)                                     | <b>Week 26:</b><br>25.9%<br>(29/112)<br><br><b>Overall:</b><br>31.1%<br>(41/132)    | For both<br>ADA-EU and<br>PF-06410293,<br>ADAB-<br>positive<br>patients had<br>approx. 60%<br>lower serum<br>drug<br>concentration<br>than ADAB-<br>negative<br>patients | n/a                                                                |

| Biosimilar /<br>Manufacturer                               | Participants                                 | cDMAR<br>D or<br>Previous<br>Therapy             | Trial Registration<br>and Design                                                                                                                                                                                            | Patients with ADABs<br>(% of total patients per<br>treatment group, [n <sub>1</sub> /N]x100) |                                                                                                                                                                              | Patients with nAbs<br>(% of ADAB-positive patients<br>per treatment group,<br>[n <sub>2</sub> /n <sub>1</sub> ]x100) |                                                                                                                                                                            | PK by ADAB<br>Status | Effect of<br>ADABs on PD,<br>efficacy, and<br>safety<br>parameters |
|------------------------------------------------------------|----------------------------------------------|--------------------------------------------------|-----------------------------------------------------------------------------------------------------------------------------------------------------------------------------------------------------------------------------|----------------------------------------------------------------------------------------------|------------------------------------------------------------------------------------------------------------------------------------------------------------------------------|----------------------------------------------------------------------------------------------------------------------|----------------------------------------------------------------------------------------------------------------------------------------------------------------------------|----------------------|--------------------------------------------------------------------|
|                                                            |                                              |                                                  |                                                                                                                                                                                                                             | Reference<br>product                                                                         | Biosimilar                                                                                                                                                                   | Reference<br>product                                                                                                 | Biosimilar                                                                                                                                                                 |                      |                                                                    |
|                                                            |                                              |                                                  | receive PF-06410293<br>Follow-up period:<br>Weeks 79-92                                                                                                                                                                     |                                                                                              |                                                                                                                                                                              |                                                                                                                      |                                                                                                                                                                            |                      |                                                                    |
| Exemptia<br>(ZRC-3197)<br><br>Cadila<br>Healthcare         | Moderate<br>to severe<br>RA                  | MTX                                              | [NOT<br>REGISTERED AT<br>ClinicalTrials.gov<br>or EudraCT] [35]<br>N=120<br><br>Randomized (1:1)<br>double-blind study<br>patients treated<br>with ADA (US) or<br>ZRC-3197 for 12<br>weeks                                  | <b>Week 12:</b><br>1.6% (1/60)                                                               | <b>Week 12:</b><br>3.3% (2/60)                                                                                                                                               | n/a                                                                                                                  | n/a                                                                                                                                                                        | n/a                  | n/a                                                                |
| <b>Plaque<br/>psoriasis</b>                                |                                              |                                                  |                                                                                                                                                                                                                             |                                                                                              |                                                                                                                                                                              |                                                                                                                      |                                                                                                                                                                            |                      |                                                                    |
| Solymbic<br>(ABP 501,<br>adalimumab-<br>atto)<br><br>Amgen | Moderate<br>to severe<br>plaque<br>psoriasis | Non-<br>biologic:<br>75%<br><br>Biologic:<br>18% | 20120263<br>(NCT01970488)<br>N=350 [54, 69]<br><br>Randomized (1:1)<br>double-blind<br>treatment with<br>ABP 501 or ADL<br>for 16 weeks<br><br>After Week 16,<br>patients with ≥50%<br>improvement in<br>PASI were eligible | <b>Week 16:</b><br>63.6%<br>(110/173)<br><br><b>Week 20:</b><br>ADL/ADL<br>59.5%<br>(47/79)  | <b>Week 16:</b><br>55.2% (96/174)<br><br><b>Week 20:</b><br>ABP 501/<br>ABP 501<br>54.6% (83/152)<br><br>ADL/<br>ABP 501<br>64.9% (50/77)<br><br><b>Week 52:</b><br>ABP 501/ | <b>Week 16:</b><br>21.8%<br>(24/110)<br><br><b>Week 20:</b><br>ADL/ADL<br>19.1% (9/47)                               | <b>Week 16:</b><br>17.7% (17/96)<br><br><b>Week 20:</b><br>ABP 501/<br>ABP 501<br>13.3% (11/83)<br><br>ADL/<br>ABP 501<br>20.0% (10/50)<br><br><b>Week 52:</b><br>ABP 501/ | n/a                  | n/a                                                                |

| Biosimilar /<br>Manufacturer                                    | Participants                                 | cDMAR<br>D or<br>Previous<br>Therapy    | Trial Registration<br>and Design                                                                                                                                                                  | Patients with ADABs<br>(% of total patients per<br>treatment group, [n <sub>1</sub> /N]x100)                       |                                                                                                                                                                                        | Patients with nAbs<br>(% of ADAB-positive patients<br>per treatment group,<br>[n <sub>2</sub> /n <sub>1</sub> ]x100) |                                                                                                                                                                             | PK by ADAB<br>Status | Effect of<br>ADABs on PD,<br>efficacy, and<br>safety<br>parameters                                                                               |
|-----------------------------------------------------------------|----------------------------------------------|-----------------------------------------|---------------------------------------------------------------------------------------------------------------------------------------------------------------------------------------------------|--------------------------------------------------------------------------------------------------------------------|----------------------------------------------------------------------------------------------------------------------------------------------------------------------------------------|----------------------------------------------------------------------------------------------------------------------|-----------------------------------------------------------------------------------------------------------------------------------------------------------------------------|----------------------|--------------------------------------------------------------------------------------------------------------------------------------------------|
|                                                                 |                                              |                                         |                                                                                                                                                                                                   | Reference<br>product                                                                                               | Biosimilar                                                                                                                                                                             | Reference<br>product                                                                                                 | Biosimilar                                                                                                                                                                  |                      |                                                                                                                                                  |
|                                                                 |                                              |                                         | to continue treatment until week 48 - those initially randomized ABP 501 continued their regimen and those randomized to ADL were re-randomized (1:1) to ADL or ABP 501; follow-up was to Week 52 | <b>Week 52:</b><br>ADL/ADL<br>74.7%<br>(59/79)<br><br><b>Week 17-52 (emergent):</b><br>ADL/ADL<br>35.5%<br>(11/31) | ABP 501<br>68.4% (104/152)<br><br>ADL/<br>ABP 501<br>72.7% (56/77)<br><br><b>Week 17-52 (emergent):</b><br>ABP 501/<br>ABP 501<br>35.6% (26/73)<br><br>ADL/<br>ABP 501<br>28.6% (8/28) | ADL/ADL<br>27.1% (16/59)<br><br><br><b>Week 17-52 (emergent):</b><br>ADL/ADL<br>0                                    | ABP 501<br>20.2%<br>(21/104)<br><br>ADL/<br>ABP 501<br>33.9% (19/56)<br><br><b>Week 17-52 (emergent):</b><br>ABP 501/<br>ABP 501<br>0<br><br>ADL/<br>ABP 501<br>0           |                      |                                                                                                                                                  |
| Hyrimoz<br>(GP2017,<br>adalimumab-<br>adaz)<br><br>Hexal/Sandoz | Moderate<br>to severe<br>plaque<br>psoriasis | Topical:<br>76%<br><br>Biologic:<br>21% | GP17-301<br>(NCT02016105)<br>[23, 55]<br>N=465<br><br>Treatment Period 1<br>(Weeks 1-16):<br>Randomized (1:1)<br>double-blind<br>treatment with<br>GP2017 or ADL<br>for 15 weeks<br>(Period 1)    | <b>Weeks 1-17:</b><br>34.1%<br>(75/220)<br><br><b>Weeks 17-51:</b><br>ADL/ADL<br>45.1%<br>(55/122)                 | <b>Weeks 1-17:</b><br>36.8% (81/220)<br><br><b>Weeks 17-51:</b><br>ADL/GP2017<br>39.3% (24/61)<br><br>GP2017/GP2017<br>35.8% (44/123)<br><br>GP2017/ADL<br>46.7% (28/60)               | <b>Weeks 1-17:</b><br>80.0% (60/75)<br><br><b>Weeks 17-51:</b><br>ADL/ADL<br>85.4% (47/55)                           | <b>Weeks 1-17:</b><br>80.2% (65/81)<br><br><b>Weeks 17-51:</b><br>ADL/GP2017<br>100% (24/24)<br><br>GP2017/GP2017<br>17<br>86.4% (38/44)<br><br>GP2017/ADL<br>75.0% (21/28) | n/a                  | PASI75<br>response at<br>Week 16:<br><b>ADL</b><br>ADAB-positive:<br>39%<br>ADAB-<br>negative: 72%<br><br><b>GP2017</b><br>ADAB-positive:<br>43% |





| Biosimilar /<br>Manufacturer                               | Participants          | cDMAR<br>D or<br>Previous<br>Therapy | Trial Registration<br>and Design                                                                                                                                                             | Patients with ADABs<br>(% of total patients per<br>treatment group, [n <sub>1</sub> /N]x100)                                                                                                                                                                                        |                           | Patients with nAbs<br>(% of ADAB-positive patients<br>per treatment group,<br>[n <sub>2</sub> /n <sub>1</sub> ]x100) |                           | PK by ADAB<br>Status                                                                                                                                                                | Effect of<br>ADABs on PD,<br>efficacy, and<br>safety<br>parameters |
|------------------------------------------------------------|-----------------------|--------------------------------------|----------------------------------------------------------------------------------------------------------------------------------------------------------------------------------------------|-------------------------------------------------------------------------------------------------------------------------------------------------------------------------------------------------------------------------------------------------------------------------------------|---------------------------|----------------------------------------------------------------------------------------------------------------------|---------------------------|-------------------------------------------------------------------------------------------------------------------------------------------------------------------------------------|--------------------------------------------------------------------|
|                                                            |                       |                                      |                                                                                                                                                                                              | Reference<br>product                                                                                                                                                                                                                                                                | Biosimilar                | Reference<br>product                                                                                                 | Biosimilar                |                                                                                                                                                                                     |                                                                    |
| Benepali<br>(SB4)<br><br>Samsung<br>Bioepis                | Healthy<br>volunteers | -                                    | SB4-G11-NHV<br>(NCT01865552)<br>[25]<br>N=138<br><br>Randomized, 3-<br>part, 2-period (21<br>days each), cross-<br>over study of ETN-<br>EU, ETN-US, and<br>SB4                              | ETN-EU<br><b>(Parts A, C):</b><br>15.6% (7/45)<br><br>ETN-US<br><b>(Parts B, C):</b><br>22.7%<br>(10/44)<br><br>Numbers of<br>available<br>samples for<br>ETN-EU and<br>ETN-US<br>were<br>calculated<br>based on the<br>percentages<br>and the<br>numbers<br>patients with<br>ADABs | <b>Parts (A, B):</b><br>0 | ETN-EU<br><b>(Parts A, C):</b><br>14.3% (1/7)<br><br>ETN-US<br><b>(Parts B, C):</b><br>0                             | <b>Parts (A, B):</b><br>0 | n/a                                                                                                                                                                                 | n/a                                                                |
| Erelzi<br>(GP2015,<br>etanercept-szzs)<br><br>Hexal/Sandoz | Healthy<br>volunteers | n/a                                  | Studies GP15-101,<br>GP15-102, and<br>GP15-104 [26]<br><br>Randomized, 12-<br>week, double-<br>blind, 2-way cross-<br>over studies of<br>GP2015 and ETN-<br>EU (G15-101, and<br>GP15-104) or | <b>n/a</b>                                                                                                                                                                                                                                                                          | <b>n/a</b>                | <b>n/a</b>                                                                                                           | <b>n/a</b>                | Not assessed,<br>because of<br>only 3 patients<br>with ADABs<br>across all three<br>studies (Study<br>GP15-104,<br>EU-ETN arm);<br>all were near<br>the detection<br>limit and none | n/a                                                                |

| Biosimilar /<br>Manufacturer                | Participants          | cDMAR<br>D or<br>Previous<br>Therapy | Trial Registration<br>and Design                                                                                                                                                                                  | Patients with ADABs<br>(% of total patients per<br>treatment group, [n <sub>1</sub> /N]x100)                                                                          |                                                                                                                                                                                     | Patients with nAbs<br>(% of ADAB-positive patients<br>per treatment group,<br>[n <sub>2</sub> /n <sub>1</sub> ]x100) |                                                                                                                                       | PK by ADAB<br>Status                                                                                                                                                                                 | Effect of<br>ADABs on PD,<br>efficacy, and<br>safety<br>parameters                                                                                                                                                        |
|---------------------------------------------|-----------------------|--------------------------------------|-------------------------------------------------------------------------------------------------------------------------------------------------------------------------------------------------------------------|-----------------------------------------------------------------------------------------------------------------------------------------------------------------------|-------------------------------------------------------------------------------------------------------------------------------------------------------------------------------------|----------------------------------------------------------------------------------------------------------------------|---------------------------------------------------------------------------------------------------------------------------------------|------------------------------------------------------------------------------------------------------------------------------------------------------------------------------------------------------|---------------------------------------------------------------------------------------------------------------------------------------------------------------------------------------------------------------------------|
|                                             |                       |                                      |                                                                                                                                                                                                                   | Reference<br>product                                                                                                                                                  | Biosimilar                                                                                                                                                                          | Reference<br>product                                                                                                 | Biosimilar                                                                                                                            |                                                                                                                                                                                                      |                                                                                                                                                                                                                           |
|                                             |                       |                                      | ETN-US (GP15-102)                                                                                                                                                                                                 |                                                                                                                                                                       |                                                                                                                                                                                     |                                                                                                                      |                                                                                                                                       | were neutralizing.                                                                                                                                                                                   |                                                                                                                                                                                                                           |
| LBEC0101<br>LG Chem                         | Healthy<br>volunteers | -                                    | LG-ECCL003<br>(NCT01725620)<br>[27]<br>N=48<br><br>Randomized,<br>double-blind,<br>single-dose, 2-<br>period, 2-sequence<br>(LBEC0101-ETN<br>and ETN-<br>LBEC0101), cross-<br>over study of ETN<br>or LBEC0101    | Anti-ETN<br>antibodies<br><br><b>Week 5,<br/>After 1<sup>st</sup> dose<br/>in ETN-<br/>LBEC0101<br/>sequence:<br/>16.7% (4/24)</b>                                    | Anti-ETN<br>antibodies<br><br><b>Week 5,<br/>After 1<sup>st</sup> dose in<br/>LBEC0101-<br/>ETN sequence:<br/>4.5% (1/22)</b>                                                       | n/a                                                                                                                  | n/a                                                                                                                                   | C <sub>max</sub> and<br>AUC <sub>inf</sub> after<br>ETN or<br>LBEC0101<br>administration<br>did not differ<br>significantly<br>between<br>ADAB-<br>positive and<br>ADAB-<br>negative<br>participants | n/a<br>(healthy<br>volunteers)                                                                                                                                                                                            |
| <b>Rheumatic<br/>diseases</b>               |                       |                                      |                                                                                                                                                                                                                   |                                                                                                                                                                       |                                                                                                                                                                                     |                                                                                                                      |                                                                                                                                       |                                                                                                                                                                                                      |                                                                                                                                                                                                                           |
| Benepali<br>(SB4)<br><br>Samsung<br>Bioepis | RA                    | MTX                                  | SB4-G31-RA<br>(NCT01895309)<br>[36, 79, 80, 96]<br>N=596<br><br>Randomized (1:1)<br>double-blind<br>treatment with SB4<br>or ETN for 52<br>weeks<br><br>OL treatment with<br>SB4 in patients<br>who completed the | <b>Week 0:</b><br>0<br><br><b>Week 4:</b><br>11.0%<br>(32/291) <sup>a</sup><br><br><b>Week 8:</b><br>2.1% (6/288) <sup>a</sup><br><br><b>Week 52:</b><br>0.7% (2/296) | <b>Week 0:</b><br>0<br><br><b>Week 4:</b><br>0.3% (1/299)<br><br><b>Week 8:</b><br>0.3% (1/298) <sup>a</sup><br><br><b>Week 52:</b><br>0.3% (1/299)<br><br><b>Weeks<br/>53-100:</b> | <b>Week 0:</b><br>0<br><br><b>Week 4:</b><br>0<br><br><b>Week 8:</b><br>2.6% (1/38)<br><br><b>Week 52:</b><br>0      | <b>Week 0:</b><br>0<br><br><b>Week 4:</b><br>0<br><br><b>Week 8:</b><br>0<br><br><b>Week 52:</b><br>0<br><br><b>Weeks<br/>53-100:</b> | No data                                                                                                                                                                                              | At Week 24,<br>ADAB-positive<br>patients had<br>lower ACR20<br>rate than<br>ADAB-negative<br>patients in the<br>ETN group<br>(72.4% vs<br>81.5%), but not<br>in the SB4<br>group (100% vs<br>78.0%) [there<br>were only 2 |

| Biosimilar /<br>Manufacturer           | Participants | cDMAR<br>D or<br>Previous<br>Therapy | Trial Registration<br>and Design                                                                                                                                                                                                                                                  | Patients with ADABs<br>(% of total patients per<br>treatment group, [n <sub>1</sub> /N]x100)                  |                                                                                                                                            | Patients with nAbs<br>(% of ADAB-positive patients<br>per treatment group,<br>[n <sub>2</sub> /n <sub>1</sub> ]x100) |                                                                              | PK by ADAB<br>Status                                                                          | Effect of<br>ADABs on PD,<br>efficacy, and<br>safety<br>parameters                                          |
|----------------------------------------|--------------|--------------------------------------|-----------------------------------------------------------------------------------------------------------------------------------------------------------------------------------------------------------------------------------------------------------------------------------|---------------------------------------------------------------------------------------------------------------|--------------------------------------------------------------------------------------------------------------------------------------------|----------------------------------------------------------------------------------------------------------------------|------------------------------------------------------------------------------|-----------------------------------------------------------------------------------------------|-------------------------------------------------------------------------------------------------------------|
|                                        |              |                                      |                                                                                                                                                                                                                                                                                   | Reference<br>product                                                                                          | Biosimilar                                                                                                                                 | Reference<br>product                                                                                                 | Biosimilar                                                                   |                                                                                               |                                                                                                             |
|                                        |              |                                      | double-blind phase<br>for additional 48<br>weeks                                                                                                                                                                                                                                  |                                                                                                               | SB4/SB4:<br>0.8% (1/126)<br><br>ETN/SB4:<br>0.9% (1/117)                                                                                   |                                                                                                                      | SB4/SB4:<br>0<br><br>ETN/SB4:<br>0                                           |                                                                                               | patients with<br>ADABs in the<br>SB4 group]                                                                 |
| CHS-0214<br><br>Coherus<br>BioSciences | RA           | MTX                                  | CHS-0214-02, Part<br>1 and Part 2<br>(NCT02115750)<br>[37]<br>N=512<br><br>Part 1:<br>Randomized (1:1)<br>double-blind<br>treatment with<br>CHS-0214 or ETN<br>for 24 weeks<br>Part 2: ACR20<br>achievers in both<br>groups received<br>CHS-0214 for an<br>additional 24<br>weeks | <b>Week 1-24:</b><br>4.7%                                                                                     | <b>Week 1-24:</b><br>1.3%<br><br><b>Week 25-52:</b><br>CHS-0214/<br>CHS-0214<br>1.4%<br><br><b>Week 25-52:</b><br>ETN/<br>CHS-0214<br>0.7% | n/a                                                                                                                  | n/a                                                                          | n/a                                                                                           | n/a                                                                                                         |
| LBEC0101<br><br>LG Chem                | RA           | MTX                                  | LG-ECCL002<br>(NCT02357069)<br>[38]<br>N=374<br><br>Randomized (1:1)<br>treatment with<br>LBEC0101 or ETN                                                                                                                                                                         | <b>Week 12:</b><br>4.3% (8/187)<br><br><b>Week 24:</b><br>2.1% (4/187)<br><br><b>Week 52:</b><br>3.7% (7/187) | <b>Week 12:</b><br>0.5% (1/187)<br><br><b>Week 24:</b><br>0.5% (1/187)<br><br><b>Week 52:</b><br>0.5% (1/187)                              | <b>Week 12:</b><br>0<br><br><b>Week 24:</b><br>0<br><br><b>Week 52:</b><br>0                                         | <b>Week 12:</b><br>0<br><br><b>Week 24:</b><br>0<br><br><b>Week 52:</b><br>0 | Not<br>determined,<br>because of the<br>low number of<br>ADAB-<br>positive<br>patients in the | Not determined,<br>because of the<br>now number of<br>ADAB-positive<br>patients in the<br>LBEC0101<br>group |

| Biosimilar /<br>Manufacturer                                | Participants                        | cDMAR<br>D or<br>Previous<br>Therapy                                     | Trial Registration<br>and Design                                                                                                                                                                                                                                                                                                         | Patients with ADABs<br>(% of total patients per<br>treatment group, [n <sub>1</sub> /N]x100)           |                                                                                              | Patients with nAbs<br>(% of ADAB-positive patients<br>per treatment group,<br>[n <sub>2</sub> /n <sub>1</sub> ]x100) |                                                                                                    | PK by ADAB<br>Status | Effect of<br>ADABs on PD,<br>efficacy, and<br>safety<br>parameters |
|-------------------------------------------------------------|-------------------------------------|--------------------------------------------------------------------------|------------------------------------------------------------------------------------------------------------------------------------------------------------------------------------------------------------------------------------------------------------------------------------------------------------------------------------------|--------------------------------------------------------------------------------------------------------|----------------------------------------------------------------------------------------------|----------------------------------------------------------------------------------------------------------------------|----------------------------------------------------------------------------------------------------|----------------------|--------------------------------------------------------------------|
|                                                             |                                     |                                                                          |                                                                                                                                                                                                                                                                                                                                          | Reference<br>product                                                                                   | Biosimilar                                                                                   | Reference<br>product                                                                                                 | Biosimilar                                                                                         |                      |                                                                    |
|                                                             |                                     |                                                                          | for 52 weeks<br>(Period 1, weeks 1-<br>24 [primary<br>assessment]; Period<br>2, weeks 25-52<br>[secondary<br>assessment]), with<br>follow-up to week<br>54                                                                                                                                                                               | <b>Overall:</b><br>9.6%<br>(18/187)                                                                    | <b>Overall:</b><br>1.6% (3/187)                                                              | <b>Overall:</b><br>0                                                                                                 | <b>Overall:</b><br>0                                                                               | LBEC0101<br>group    |                                                                    |
| <b>Plaque<br/>psoriasis</b>                                 |                                     |                                                                          |                                                                                                                                                                                                                                                                                                                                          |                                                                                                        |                                                                                              |                                                                                                                      |                                                                                                    |                      |                                                                    |
| Erelzi<br>(GP2015,<br>etanercept-szszs)<br><br>Hexal/Sandoz | Chronic<br>plaque-type<br>psoriasis | None:<br>68.9%<br><br>Any:<br>30.1%<br><br>TNFi<br>(not<br>ETN):<br>0.9% | EGALITY, Study<br>302<br>(NCT01891864)<br>[56, 81]<br>N=531<br><br>Treatment period 1<br>(Weeks 1-12):<br>Randomized (1:1),<br>double-blind<br>treatment with<br>GP2015 or ETN<br>for 12 weeks<br><br>Treatment period 2<br>(Weeks 13-30):<br>Patients with<br>≥PASI 50 at week<br>12 were re-<br>randomized 1:1 to<br>continue existing | <b>Week 12:</b><br>1.9% (5/267)<br><br><b>Weeks 13-<br/>30:</b><br>ETN/ETN<br>0<br><br>GP2015/ETN<br>0 | <b>Week 12:</b><br>0<br><br><b>Weeks 13-30:</b><br>GP2015/GP2015<br>0<br><br>ETN/GP2015<br>0 | <b>Week 12:</b><br>0<br><br><b>Weeks 13-30:</b><br>ETN/ETN<br>0<br><br>GP2015/ETN<br>0                               | <b>Week 12:</b><br>0<br><br><b>Weeks 13-30:</b><br>GP2015/GP2015<br>15<br>0<br><br>ETN/GP2015<br>0 | n/a                  | Not assessed,<br>because of only<br>3 patients with<br>ADABs       |

| Biosimilar /<br>Manufacturer                                                     | Participants          | cDMAR<br>D or<br>Previous<br>Therapy | Trial Registration<br>and Design                                                                                                                                                                           | Patients with ADABs<br>(% of total patients per<br>treatment group, [n <sub>1</sub> /N]x100)                                                              |                                                                                                                   | Patients with nAbs<br>(% of ADAB-positive patients<br>per treatment group,<br>[n <sub>2</sub> /n <sub>1</sub> ]x100)                                             |                                                                                                                   | PK by ADAB<br>Status                                                                                                                                                                                                                    | Effect of<br>ADABs on PD,<br>efficacy, and<br>safety<br>parameters |
|----------------------------------------------------------------------------------|-----------------------|--------------------------------------|------------------------------------------------------------------------------------------------------------------------------------------------------------------------------------------------------------|-----------------------------------------------------------------------------------------------------------------------------------------------------------|-------------------------------------------------------------------------------------------------------------------|------------------------------------------------------------------------------------------------------------------------------------------------------------------|-------------------------------------------------------------------------------------------------------------------|-----------------------------------------------------------------------------------------------------------------------------------------------------------------------------------------------------------------------------------------|--------------------------------------------------------------------|
|                                                                                  |                       |                                      |                                                                                                                                                                                                            | Reference<br>product                                                                                                                                      | Biosimilar                                                                                                        | Reference<br>product                                                                                                                                             | Biosimilar                                                                                                        |                                                                                                                                                                                                                                         |                                                                    |
|                                                                                  |                       |                                      | treatment for 18<br>weeks or undergo<br>three 6-week<br>switches<br><br>Extension Period<br>(Weeks 31-52):<br>Patients continued<br>treatment from the<br>end of period 2 for<br>an additional 22<br>weeks |                                                                                                                                                           |                                                                                                                   |                                                                                                                                                                  |                                                                                                                   |                                                                                                                                                                                                                                         |                                                                    |
| <b>Reference product: Infliximab</b>                                             |                       |                                      |                                                                                                                                                                                                            |                                                                                                                                                           |                                                                                                                   |                                                                                                                                                                  |                                                                                                                   |                                                                                                                                                                                                                                         |                                                                    |
| <b>Healthy<br/>volunteers</b>                                                    |                       |                                      |                                                                                                                                                                                                            |                                                                                                                                                           |                                                                                                                   |                                                                                                                                                                  |                                                                                                                   |                                                                                                                                                                                                                                         |                                                                    |
| Flixabi/<br>Renflexis<br>(SB2,<br>infliximab-<br>abda)<br><br>Samsung<br>Bioepis | Healthy<br>volunteers | n/a                                  | SB2-G11-NHV,<br>NCT01922336 [28]<br>N=159<br><br>Randomized<br>(1:1:1), single-<br>blind, single-dose<br>study of INF (US),<br>INF (EU), and SB2<br>with a follow-up of<br>10 weeks                        | <b>Predose:</b><br>INF-EU:<br>0<br><br>INF-US:<br>0<br><br><b>Week 4:</b><br>INF-EU:<br>0<br><br>INF-US:<br>1.9% (1/53)<br><br><b>Week 10:</b><br>INF-EU: | <b>Predose:</b><br>0<br><br><br><br><b>Week 4:</b><br>3.8% (2/53)<br><br><br><br><b>Week 10:</b><br>47.2% (25/53) | <b>Predose:</b><br>INF-EU:<br>0<br><br>INF-US:<br>0<br><br><b>Week 4:</b><br>INF-EU:<br>0<br><br>INF-US:<br>0<br><br><b>Week 10:</b><br>INF-EU:<br>70.0% (14/20) | <b>Predose:</b><br>0<br><br><br><br><b>Week 4:</b><br>50.0% (1/2)<br><br><br><br><b>Week 10:</b><br>56.0% (14/25) | Compared<br>with ADAB-<br>negative<br>individuals,<br>ADAB-<br>positive ones<br>had approx.<br>30% lower<br>AUC <sub>inf</sub> , 35-<br>40% higher<br>clearance, 40-<br>50% lower t <sub>1/2</sub> ,<br>and similar<br>C <sub>max</sub> | n/a (healthy<br>volunteers)                                        |

| Biosimilar /<br>Manufacturer                                                     | Participants          | cDMAR<br>D or<br>Previous<br>Therapy | Trial Registration<br>and Design                                                                                                                                                                                     | Patients with ADABs<br>(% of total patients per<br>treatment group, [n <sub>1</sub> /N]x100)                                                            |                                                                             | Patients with nAbs<br>(% of ADAB-positive patients<br>per treatment group,<br>[n <sub>2</sub> /n <sub>1</sub> ]x100) |                                                               | PK by ADAB<br>Status                                                                                                 | Effect of<br>ADABs on PD,<br>efficacy, and<br>safety<br>parameters                                                 |
|----------------------------------------------------------------------------------|-----------------------|--------------------------------------|----------------------------------------------------------------------------------------------------------------------------------------------------------------------------------------------------------------------|---------------------------------------------------------------------------------------------------------------------------------------------------------|-----------------------------------------------------------------------------|----------------------------------------------------------------------------------------------------------------------|---------------------------------------------------------------|----------------------------------------------------------------------------------------------------------------------|--------------------------------------------------------------------------------------------------------------------|
|                                                                                  |                       |                                      |                                                                                                                                                                                                                      | Reference<br>product                                                                                                                                    | Biosimilar                                                                  | Reference<br>product                                                                                                 | Biosimilar                                                    |                                                                                                                      |                                                                                                                    |
|                                                                                  |                       |                                      |                                                                                                                                                                                                                      | 37.7%<br>(20/53)<br><br>INF-US:<br>37.7%<br>(20/53)                                                                                                     |                                                                             | INF-US:<br>35.0% (7/20)                                                                                              |                                                               |                                                                                                                      |                                                                                                                    |
| Inflectra<br>(CT-P13,<br>infliximab-<br>dyyb)<br><br>Celltrion                   | Healthy<br>volunteers | n/a                                  | CT-P13 1.4<br>(EudraCT 2013-<br>003173-10) [29,<br>67]<br>N=213<br><br>Randomized<br>(1:1:1) trial<br>evaluating PK, PD,<br>and<br>immunogenicity of<br>single-dose INF-<br>EU, INF-US, and<br>CT-P13 for 8<br>weeks | <b>Week 8</b><br>INF-EU<br>25.4%<br>(18/71)<br><br>INF-US<br>11.4% (8/70)<br><br>(p-value for<br>difference<br>between INF-<br>EU and INF-<br>US: 0.15) | <b>Week 8</b><br>27.1% (19/70)                                              | <b>Week 8</b><br>INF-EU<br>100% (18/18)<br><br>INF-US<br>100% (8/8)                                                  | <b>Week 8</b><br>100% (19/19)                                 | In ADAB-<br>positive<br>patients,<br>AUC <sub>inf</sub> was<br>15-23% lower<br>than in ADAB-<br>negative<br>patients | n/a<br>(healthy<br>volunteers)                                                                                     |
| <b>Rheumatic<br/>diseases</b>                                                    |                       |                                      |                                                                                                                                                                                                                      |                                                                                                                                                         |                                                                             |                                                                                                                      |                                                               |                                                                                                                      |                                                                                                                    |
| Flixabi/<br>Renflexis<br>(SB2,<br>infliximab-<br>abda)<br><br>Samsung<br>Bioepis | RA                    | MTX                                  | SB2-G31-RA<br>(NCT01936181)<br>[39, 77, 78, 97]<br>N=584<br><br>Randomized (1:1)<br>double-blind<br>treatment with SB2                                                                                               | <b>Week 0:</b><br>2.4%<br>(7/293)<br><br><b>Week 6:</b><br>5.6%<br>(16/286)                                                                             | <b>Week 0:</b><br>1.7%<br>(5/290)<br><br><b>Week 6:</b><br>7.4%<br>(21/282) | <b>Week 0:</b><br>0<br><br><b>Week 6:</b><br>43.8%<br>(7/16)                                                         | <b>Week 0:</b><br>0<br><br><b>Week 6:</b><br>52.4%<br>(11/21) | n/a                                                                                                                  | In both<br>treatment<br>groups, there<br>was a lower<br>ACR20<br>response rate<br>and higher rate<br>of IRRs among |

| Biosimilar /<br>Manufacturer                                               | Participants | cDMARD or<br>Previous<br>Therapy | Trial Registration<br>and Design                                                                                                                                                                            | Patients with ADABs<br>(% of total patients per<br>treatment group, [n <sub>1</sub> /N]x100)                                                                                                                      |                                                                                                                                                                                                                                                                 | Patients with nAbs<br>(% of ADAB-positive patients<br>per treatment group,<br>[n <sub>2</sub> /n <sub>1</sub> ]x100)                                                                                          |                                                                                                                                                                                                                                                             | PK by ADAB<br>Status                                                                                                                   | Effect of<br>ADABs on PD,<br>efficacy, and<br>safety<br>parameters                                                                                                                                                                                                           |
|----------------------------------------------------------------------------|--------------|----------------------------------|-------------------------------------------------------------------------------------------------------------------------------------------------------------------------------------------------------------|-------------------------------------------------------------------------------------------------------------------------------------------------------------------------------------------------------------------|-----------------------------------------------------------------------------------------------------------------------------------------------------------------------------------------------------------------------------------------------------------------|---------------------------------------------------------------------------------------------------------------------------------------------------------------------------------------------------------------|-------------------------------------------------------------------------------------------------------------------------------------------------------------------------------------------------------------------------------------------------------------|----------------------------------------------------------------------------------------------------------------------------------------|------------------------------------------------------------------------------------------------------------------------------------------------------------------------------------------------------------------------------------------------------------------------------|
|                                                                            |              |                                  |                                                                                                                                                                                                             | Reference<br>product                                                                                                                                                                                              | Biosimilar                                                                                                                                                                                                                                                      | Reference<br>product                                                                                                                                                                                          | Biosimilar                                                                                                                                                                                                                                                  |                                                                                                                                        |                                                                                                                                                                                                                                                                              |
|                                                                            |              |                                  | or INF for 54<br>weeks<br><br>At week 54, INF-<br>treated patients<br>were re-<br>randomized (1:1)<br>to switch to SB2 or<br>continue on INF<br>until week 70<br>(assessment<br>continued until<br>week 78) | <b>Week 14:</b><br>22.5%<br>(63/280)<br><br><b>Week 30:</b><br>43.9%<br>(116/264)<br><br><b>Week 54:</b><br>40.1%<br>(89/222) <sup>b</sup><br><br><b>Weeks<br/>54-78:</b><br>INF/INF <sup>c</sup><br>14.9% (7/47) | <b>Week 14:</b><br>26.6%<br>(73/274)<br><br><b>Week 30:</b><br>53.0%<br>(133/251)<br><br><b>Week 54:</b><br>52.9%<br>(118/223) <sup>b</sup><br><br><b>Weeks<br/>54-78:</b><br>INF/SB2 <sup>c</sup><br>14.6% (6/41)<br><br>SB2/SB2 <sup>c</sup><br>14.1% (11/78) | <b>Week 14:</b><br>95.2%<br>(60/63)<br><br><b>Week 30:</b><br>94.0%<br>(109/116)<br><br><b>Week 54:</b><br>87.6%<br>(78/89) <sup>b</sup><br><br><b>Weeks<br/>54-78:</b><br>INF/INF <sup>c</sup><br>100% (7/7) | <b>Week 14:</b><br>95.9%<br>(70/73)<br><br><b>Week 30:</b><br>97.0%<br>(129/133)<br><br><b>Week 54:</b><br>83.9%<br>(99/118) <sup>b</sup><br><br><b>Weeks<br/>54-78:</b><br>INF/SB2 <sup>c</sup><br>100% (36/6)<br><br>SB2/SB2 <sup>c</sup><br>100% (11/11) |                                                                                                                                        | ADAB-positive<br>vs ADAB-<br>negative<br>patients<br><br><b>ACR20<br/>Week 30:</b><br>INF: 58.7% vs<br>73.6%<br>SB2: 56.7% vs<br>73.1%<br><br><b>Week 54:</b><br>INF: 68.1% vs<br>70.8%<br>SB2: 58.7% vs<br>76.3%<br><br>IRR<br>INF: 6.5% vs<br>3.2%<br>SB2: 8.4% vs<br>1.9% |
| Inflectra,<br>Remsima<br>(CT-P13,<br>infliximab-<br>dyyb)<br><br>Celltrion | RA           | MTX                              | PLANETRA (CT-<br>P13 3.1,<br>NCT01217086)<br>[44, 94]<br>N=606<br><br>Randomized (1:1)<br>double-blind                                                                                                      | <b>Week 14:</b><br>25.8%<br>(70/271)<br><br><b>Week 30:</b><br>48.2%<br>(122/253)<br><br><b>Week 54:</b>                                                                                                          | <b>Week 14:</b><br>25.4%<br>(69/272)<br><br><b>Week 30:</b><br>48.4%<br>(122/252)<br><br><b>Week 54:</b>                                                                                                                                                        | <b>Week 54:</b><br>~100%                                                                                                                                                                                      | <b>Week 54:</b><br>~100%                                                                                                                                                                                                                                    | In ADAB-<br>positive<br>patients, C <sub>max</sub><br>was 12-16%<br>lower and C <sub>min</sub><br>was 67-68%<br>lower than in<br>ADAB- | Efficacy<br>responses were<br>generally lower<br>in ADAB-<br>positive than<br>ADAB-negative<br>patients                                                                                                                                                                      |

| Biosimilar /<br>Manufacturer | Participants | cDMAR<br>D or<br>Previous<br>Therapy | Trial Registration<br>and Design                 | Patients with ADABs<br>(% of total patients per<br>treatment group, [n <sub>1</sub> /N]x100) |                                                                                     | Patients with nAbs<br>(% of ADAB-positive patients<br>per treatment group,<br>[n <sub>2</sub> /n <sub>1</sub> ]x100) |                           | PK by ADAB<br>Status | Effect of<br>ADABs on PD,<br>efficacy, and<br>safety<br>parameters                                                                                                                                                                                                                                                                                                                                                                    |
|------------------------------|--------------|--------------------------------------|--------------------------------------------------|----------------------------------------------------------------------------------------------|-------------------------------------------------------------------------------------|----------------------------------------------------------------------------------------------------------------------|---------------------------|----------------------|---------------------------------------------------------------------------------------------------------------------------------------------------------------------------------------------------------------------------------------------------------------------------------------------------------------------------------------------------------------------------------------------------------------------------------------|
|                              |              |                                      |                                                  | Reference<br>product                                                                         | Biosimilar                                                                          | Reference<br>product                                                                                                 | Biosimilar                |                      |                                                                                                                                                                                                                                                                                                                                                                                                                                       |
|                              |              |                                      | treatment with CT-<br>P13 or IFN for 54<br>weeks | 36.0%<br>(108/300)<br><br>denominator<br>N calculated<br>based on n<br>and % values          | 41.1%<br>(124/302)<br><br>denominator N<br>calculated based<br>on n and %<br>values | n/N data not<br>available                                                                                            | n/N data not<br>available | negative<br>patients | ADAB-positive<br>vs ADAB-<br>negative:<br><br><b>ACR20</b><br>INF: 64.5% vs<br>75.2%<br>CT-P13: 64.8%<br>vs 81.7%<br><br><b>ACR50</b><br>INF: 33.9% vs<br>47.3%<br>CT-P13: 29.5%<br>vs 54.8%<br><br><b>ACR70</b><br>INF: 13.2% vs<br>22.5%<br>CT-P13: 7.4%<br>vs 32.5%<br><br><b>EULAR-CRP<br/>(mod-good)</b><br>INF: 82.5% vs<br>91.4%<br>CT-P13: 79.5%<br>vs 91.9%<br><br><b>EULAR-ESR<br/>(mod-good)</b><br>INF: 75.0% vs<br>89.1% |



| Biosimilar /<br>Manufacturer                                               | Participants | cDMAR<br>D or<br>Previous<br>Therapy | Trial Registration<br>and Design                                                                                                               | Patients with ADAbs<br>(% of total patients per<br>treatment group, [n <sub>1</sub> /N]x100) |                                                     | Patients with nAbs<br>(% of ADAb-positive patients<br>per treatment group,<br>[n <sub>2</sub> /n <sub>1</sub> ]x100) |                                                       | PK by ADAb<br>Status                          | Effect of<br>ADAbs on PD,<br>efficacy, and<br>safety<br>parameters                                                                                                                                                                                                                                                                                                   |
|----------------------------------------------------------------------------|--------------|--------------------------------------|------------------------------------------------------------------------------------------------------------------------------------------------|----------------------------------------------------------------------------------------------|-----------------------------------------------------|----------------------------------------------------------------------------------------------------------------------|-------------------------------------------------------|-----------------------------------------------|----------------------------------------------------------------------------------------------------------------------------------------------------------------------------------------------------------------------------------------------------------------------------------------------------------------------------------------------------------------------|
|                                                                            |              |                                      |                                                                                                                                                | Reference<br>product                                                                         | Biosimilar                                          | Reference<br>product                                                                                                 | Biosimilar                                            |                                               |                                                                                                                                                                                                                                                                                                                                                                      |
|                                                                            |              |                                      |                                                                                                                                                |                                                                                              |                                                     |                                                                                                                      |                                                       |                                               | CT-P13: 77.1%<br>vs 91.9%                                                                                                                                                                                                                                                                                                                                            |
| Inflectra,<br>Remsima<br>(CT-P13,<br>infliximab-<br>dyyb)<br><br>Celltrion | RA           | MTX                                  | PLANETRA<br>OLEX<br>(NCT01571219)<br>[45]<br>N=302<br><br>Single-arm, OL<br>treatment with CT-<br>P13 in patients who<br>completed<br>PLANETRA | <b>Week 102:</b><br>INF/CT-P13<br>44.8%<br>(64/143)                                          | <b>Week 102:</b><br>CT-P13/CT-P13<br>40.3% (64/159) | <b>Week 102:</b><br>INF/CT-P13<br>100% (64/64)                                                                       | <b>Week 102:</b><br>CT-P13/CT-<br>P13<br>100% (64/64) | n/a                                           | At weeks 54<br>and 102, in both<br>maintenance<br>and switch<br>groups, there<br>was a<br>comparable<br>change from<br>baseline in CRP<br>and ESR<br>between<br>ADAb-positive<br>and ADAb-<br>negative<br>patients<br><br>The proportions<br>of ADAb-<br>positive and –<br>negative<br>patients<br>achieving<br>ACR20 at<br>weeks 54 and<br>102 were also<br>similar |
| Inflectra,<br>Remsima                                                      | RA           | MTX                                  | JAPIC Clinical<br>Trials Information                                                                                                           | <b>Week 14:</b><br>15.1%                                                                     | <b>Week 14:</b><br>19.6%                            |                                                                                                                      |                                                       | AUC <sub>r</sub> and<br>C <sub>max</sub> were | n/a                                                                                                                                                                                                                                                                                                                                                                  |

| Biosimilar /<br>Manufacturer                                                | Participants | cDMAR<br>D or<br>Previous<br>Therapy | Trial Registration<br>and Design                                                                                                                           | Patients with ADABs<br>(% of total patients per<br>treatment group, [n <sub>1</sub> /N]x100)                                 |                                                                                                                             | Patients with nAbs<br>(% of ADAB-positive patients<br>per treatment group,<br>[n <sub>2</sub> /n <sub>1</sub> ]x100)    |                                                                                                                          | PK by ADAB<br>Status                                                                                                                                                                                                                                                                                             | Effect of<br>ADABs on PD,<br>efficacy, and<br>safety<br>parameters                                                                                                                                                                                                             |
|-----------------------------------------------------------------------------|--------------|--------------------------------------|------------------------------------------------------------------------------------------------------------------------------------------------------------|------------------------------------------------------------------------------------------------------------------------------|-----------------------------------------------------------------------------------------------------------------------------|-------------------------------------------------------------------------------------------------------------------------|--------------------------------------------------------------------------------------------------------------------------|------------------------------------------------------------------------------------------------------------------------------------------------------------------------------------------------------------------------------------------------------------------------------------------------------------------|--------------------------------------------------------------------------------------------------------------------------------------------------------------------------------------------------------------------------------------------------------------------------------|
|                                                                             |              |                                      |                                                                                                                                                            | Reference<br>product                                                                                                         | Biosimilar                                                                                                                  | Reference<br>product                                                                                                    | Biosimilar                                                                                                               |                                                                                                                                                                                                                                                                                                                  |                                                                                                                                                                                                                                                                                |
| (CT-P13,<br>infliximab-<br>dyyb)<br><br>Nippon Kayaku<br>Corp.<br>Celltrion |              |                                      | Center study<br>JapicCTI-111620<br>[42]<br>N=101<br><br>Randomized (1:1)<br>double-blind<br>treatment with CT-<br>P13 or IFN for 54<br>weeks               | <b>Week 30:</b><br>26.4%<br><br><b>Week 54:</b><br>32.1%<br><br>n/N data not<br>available                                    | <b>Week 30:</b><br>25.5%<br><br><b>Week 54:</b><br>25.5%<br><br>n/N data not<br>available                                   | <b>Week 54:</b><br>100%<br><br>n/N data not<br>available                                                                | <b>Week 54:</b><br>100%<br><br>n/N data not<br>available                                                                 | higher among<br>ADAB-<br>negative<br>patients than in<br>the entire<br>study sample                                                                                                                                                                                                                              |                                                                                                                                                                                                                                                                                |
| Inflectra,<br>Remsima<br>(CT-P13,<br>infliximab-<br>dyyb)<br><br>Celltrion  | AS           | -                                    | PLANETAS (CT-<br>P13 1.1,<br>NCT01220518)<br>[40, 74]<br>N=250<br><br>Randomized (1:1)<br>double-blind<br>treatment with CT-<br>P13 or IFN for 54<br>weeks | <b>Week 14:</b><br>10.7%<br>(13/122)<br><br><b>Week 30:</b><br>20.5%<br>(25/122)<br><br><b>Week 54:</b><br>23.0%<br>(28/122) | <b>Week 14:</b><br>8.6%<br>(11/128)<br><br><b>Week 30:</b><br>25.0%<br>(32/128)<br><br><b>Week 54:</b><br>19.5%<br>(25/128) | <b>Week 14:</b><br>100%<br>(13/13)<br><br><b>Week 30:</b><br>96.0%<br>(24/25)<br><br><b>Week 54:</b><br>100%<br>(28/28) | <b>Week 14:</b><br>90.9%<br>(10/11)<br><br><b>Week 30:</b><br>96.9%<br>(31/32)<br><br><b>Week 54:</b><br>100%<br>(25/25) | At week 30, in<br>both treatment<br>groups, there<br>was a trend<br>toward lower<br>C <sub>max,ss</sub> and<br>AUC <sub>τ</sub> with<br>higher ADAB<br>titre.<br><br>In both<br>treatment<br>groups,<br>ADAB-<br>positive<br>patients had<br>14% lower<br>C <sub>max</sub> than<br>ADAB-<br>negative<br>patients | At week 30,<br>efficacy<br>responses were<br>generally lower<br>in ADAB-<br>positive than<br>ADAB-negative<br>patients<br><br><b>ASAS20</b><br>IFN: 65.4% vs<br>74.4%<br>CT-P13: 50.0%<br>vs 77.4%<br><br><b>ASAS40</b><br>IFN: 38.5% vs<br>50.0%<br>CT-P13: 42.9%<br>vs 54.8% |

| Biosimilar /<br>Manufacturer                                               | Participants | cDMAR<br>D or<br>Previous<br>Therapy | Trial Registration<br>and Design                                                                                                                          | Patients with ADAbs<br>(% of total patients per<br>treatment group, [n <sub>1</sub> /N]x100) |                                                       | Patients with nAbs<br>(% of ADAb-positive patients<br>per treatment group,<br>[n <sub>2</sub> /n <sub>1</sub> ]x100) |                                                          | PK by ADAb<br>Status | Effect of<br>ADAbs on PD,<br>efficacy, and<br>safety<br>parameters                                                                                                                                                                                                                                                                                                                                                                                                             |
|----------------------------------------------------------------------------|--------------|--------------------------------------|-----------------------------------------------------------------------------------------------------------------------------------------------------------|----------------------------------------------------------------------------------------------|-------------------------------------------------------|----------------------------------------------------------------------------------------------------------------------|----------------------------------------------------------|----------------------|--------------------------------------------------------------------------------------------------------------------------------------------------------------------------------------------------------------------------------------------------------------------------------------------------------------------------------------------------------------------------------------------------------------------------------------------------------------------------------|
|                                                                            |              |                                      |                                                                                                                                                           | Reference<br>product                                                                         | Biosimilar                                            | Reference<br>product                                                                                                 | Biosimilar                                               |                      |                                                                                                                                                                                                                                                                                                                                                                                                                                                                                |
| Inflectra,<br>Remsima<br>(CT-P13,<br>infliximab-<br>dyyb)<br><br>Celltrion | AS           | -                                    | PLANETAS<br>OLEX<br>(NCT01571206)<br>[41]<br>N=174<br><br>Single-arm, open-<br>label treatment<br>with CT-P13 in<br>patients who<br>completed<br>PLANETAS | <b>Week 102:</b><br>INF/CT-P13<br>27.4%<br>(23/84)                                           | <b>Week 102:</b><br>CT-P13/CT-P13<br>23.3%<br>(21/90) | <b>Week 102:</b><br>INF/CT-P13<br>100%<br>(23/23)                                                                    | <b>Week 102:</b><br>CT-P13/CT-<br>P13<br>100%<br>(23/23) | n/a                  | At weeks 54<br>and 102, in both<br>maintenance<br>and switch<br>groups, there<br>was a greater<br>decline baseline<br>in CRP and<br>ESR in ADAb-<br>negative than<br>ADAb-positive<br>patients<br><br>At weeks 54<br>and 102, in both<br>maintenance<br>and switch<br>groups, there<br>was a higher<br>ASAS20<br>response rate in<br>ADAb-negative<br>than ADAb-<br>positive<br>patients:<br><br><b>Week 54</b><br>Maintenance:<br>75.7% vs 50.0%<br>Switch:<br>79.0% vs 66.7% |

| Biosimilar /<br>Manufacturer                                                          | Participants   | cDMAR<br>D or<br>Previous<br>Therapy | Trial Registration<br>and Design                                                                                                                                                                                         | Patients with ADABs<br>(% of total patients per<br>treatment group, [n <sub>1</sub> /N]x100) |                                                                                                                           | Patients with nAbs<br>(% of ADAB-positive patients<br>per treatment group,<br>[n <sub>2</sub> /n <sub>1</sub> ]x100) |            | PK by ADAB<br>Status | Effect of<br>ADABs on PD,<br>efficacy, and<br>safety<br>parameters                                                                                                                                                                                   |
|---------------------------------------------------------------------------------------|----------------|--------------------------------------|--------------------------------------------------------------------------------------------------------------------------------------------------------------------------------------------------------------------------|----------------------------------------------------------------------------------------------|---------------------------------------------------------------------------------------------------------------------------|----------------------------------------------------------------------------------------------------------------------|------------|----------------------|------------------------------------------------------------------------------------------------------------------------------------------------------------------------------------------------------------------------------------------------------|
|                                                                                       |                |                                      |                                                                                                                                                                                                                          | Reference<br>product                                                                         | Biosimilar                                                                                                                | Reference<br>product                                                                                                 | Biosimilar |                      |                                                                                                                                                                                                                                                      |
|                                                                                       |                |                                      |                                                                                                                                                                                                                          |                                                                                              |                                                                                                                           |                                                                                                                      |            |                      | <p><b>Week 102</b><br/>Maintenance:<br/>83.9% vs 70.0%<br/>Switch:<br/>84.6% vs 62.5%</p> <p>The proportions<br/>of ADAB-<br/>positive and –<br/>negative<br/>patients<br/>achieving<br/>ACR20 at<br/>weeks 54 and<br/>102 were also<br/>similar</p> |
| <p>Inflectra,<br/>Remsima<br/>(CT-P13,<br/>infliximab-<br/>dyyb)</p> <p>Celltrion</p> | AS, PsA,<br>RA | csDMAR<br>Ds, MTX                    | <p>BIO-SWITCH,<br/>Dutch Trial<br/>Register identifier<br/>NTR5279 [43]<br/>N=192</p> <p>Multicenter,<br/>prospective, cohort<br/>study of INF-<br/>treated patients<br/>who switched to<br/>CT-P13 for 6<br/>months</p> | n/a                                                                                          | <p>Anti-INF<br/>antibodies</p> <p><b>Baseline:</b><br/>10.3%<br/>(14/136)</p> <p><b>Month 6:</b><br/>6.6%<br/>(9/136)</p> | n/a                                                                                                                  | n/a        | n/a                  | n/a                                                                                                                                                                                                                                                  |

| Biosimilar /<br>Manufacturer                                               | Participants                                                                   | cDMAR<br>D or<br>Previous<br>Therapy | Trial Registration<br>and Design                                                                                                                                                                                                                   | Patients with ADABs<br>(% of total patients per<br>treatment group, [n <sub>1</sub> /N]x100)                                                                               |                                                                                                                                                                           | Patients with nAbs<br>(% of ADAB-positive patients<br>per treatment group,<br>[n <sub>2</sub> /n <sub>1</sub> ]x100)                                                                           |                                                                                                                                                                                                | PK by ADAB<br>Status                                                                                               | Effect of<br>ADABs on PD,<br>efficacy, and<br>safety<br>parameters                                                                                                                                    |
|----------------------------------------------------------------------------|--------------------------------------------------------------------------------|--------------------------------------|----------------------------------------------------------------------------------------------------------------------------------------------------------------------------------------------------------------------------------------------------|----------------------------------------------------------------------------------------------------------------------------------------------------------------------------|---------------------------------------------------------------------------------------------------------------------------------------------------------------------------|------------------------------------------------------------------------------------------------------------------------------------------------------------------------------------------------|------------------------------------------------------------------------------------------------------------------------------------------------------------------------------------------------|--------------------------------------------------------------------------------------------------------------------|-------------------------------------------------------------------------------------------------------------------------------------------------------------------------------------------------------|
|                                                                            |                                                                                |                                      |                                                                                                                                                                                                                                                    | Reference<br>product                                                                                                                                                       | Biosimilar                                                                                                                                                                | Reference<br>product                                                                                                                                                                           | Biosimilar                                                                                                                                                                                     |                                                                                                                    |                                                                                                                                                                                                       |
| Ixifi<br>(PF-06438179/<br>GP1111,<br>infliximab-<br>qbtx)<br><br>Pfizer    | Moderate<br>to severe<br>RA                                                    | MTX                                  | REFLECTIONS<br>(B537-02,<br>NCT02222493)<br>[46]<br>N=650<br><br>Randomized (1:1)<br>DB treatment with<br>IFN-EU or PF-<br>06438179/<br>GP1111 for 30<br>weeks                                                                                     | <b>Baseline:</b><br>2.8%<br>(9/323)<br><br><b>Week 14:</b><br>31.8%<br>(100/314)<br><br><b>Week 30:</b><br>49.5%<br>(144/291)<br><br><b>Overall:</b><br>51.4%<br>(167/325) | <b>Baseline:</b><br>2.8%<br>(9/322)<br><br><b>Week 14:</b><br>31.8%<br>(96/302)<br><br><b>Week 30:</b><br>48.2%<br>(136/282)<br><br><b>Overall:</b><br>49.1%<br>(157/320) | <b>Baseline:</b><br>11.1%<br>(1/9)<br><br><b>Week 14:</b><br>78.0%<br>(78/100)<br><br><b>Week 30:</b><br>83.3%<br>(120/144)<br><br><b>Overall:</b><br>85.6%<br>(143/167)                       | <b>Baseline:</b><br>11.1%<br>(1/9)<br><br><b>Week 14:</b><br>76.0%<br>(73/96)<br><br><b>Week 30:</b><br>77.2%<br>(105/136)<br><br><b>Overall:</b><br>79.0%<br>(124/157)                        | In ADAB-<br>positive<br>patients, C <sub>max</sub><br>was 10-18%<br>lower than in<br>ADAB-<br>negative<br>patients | At Week 14, a<br>greater<br>proportion of<br>ADAB-negative<br>than ADAB-<br>positive patients<br>achieved<br>ACR20:<br><br>PF-06438179/<br>GP1111:<br>69.1% vs 51.0%<br><br>INF-EU:<br>71.2% vs 49.5% |
| <b>IBD</b>                                                                 |                                                                                |                                      |                                                                                                                                                                                                                                                    |                                                                                                                                                                            |                                                                                                                                                                           |                                                                                                                                                                                                |                                                                                                                                                                                                |                                                                                                                    |                                                                                                                                                                                                       |
| Inflectra,<br>Remsima<br>(CT-P13,<br>infliximab-<br>dyyb)<br><br>Celltrion | IBD,<br>51.6%<br><br>Rheumatic<br>diseases,<br>41.2%<br><br>Psoriasis,<br>7.3% | 21.8%                                | NOR-SWITCH<br>(NCT02148640)<br>[63]<br>N=481<br><br>In this double-blind<br>trial, patients<br>receiving stable<br>INF for ≥6 months<br>were randomized<br>(1:1) to continue<br>their INF treatment<br>or be switched to<br>CT-P13, for<br>52weeks | <b>Only nAbs<br/>were<br/>assessed</b>                                                                                                                                     | <b>Only nAbs were<br/>assessed</b>                                                                                                                                        | <b>Week 52 (all):</b><br>10.8%<br>(26/241)<br><br><b>Week 52<br/>(emergent):</b><br>7.1%<br>(17/241)<br><br>Due to study<br>design, nAb<br>incidence was<br>presented as %<br>of all patients, | <b>Week 52 (all):</b><br>12.5%<br>(30/240)<br><br><b>Week 52<br/>(emergent):</b><br>7.9%<br>(19/240)<br><br>Due to study<br>design, nAb<br>incidence was<br>presented as %<br>of all patients, | n/a                                                                                                                | n/a                                                                                                                                                                                                   |

| Biosimilar /<br>Manufacturer                                   | Participants | cDMAR<br>D or<br>Previous<br>Therapy | Trial Registration<br>and Design                                                                                                                                                                                                                                                                                                                                                                                 | Patients with ADABs<br>(% of total patients per<br>treatment group, [n <sub>1</sub> /N]x100) |                                                                                                                                                                                                                                                                                                                                                                                                                                                   | Patients with nAbs<br>(% of ADAB-positive patients<br>per treatment group,<br>[n <sub>2</sub> /n <sub>1</sub> ]x100) |                                         | PK by ADAB<br>Status | Effect of<br>ADABs on PD,<br>efficacy, and<br>safety<br>parameters                                                                                                                                                                                                                                                                                                                                                                                                     |
|----------------------------------------------------------------|--------------|--------------------------------------|------------------------------------------------------------------------------------------------------------------------------------------------------------------------------------------------------------------------------------------------------------------------------------------------------------------------------------------------------------------------------------------------------------------|----------------------------------------------------------------------------------------------|---------------------------------------------------------------------------------------------------------------------------------------------------------------------------------------------------------------------------------------------------------------------------------------------------------------------------------------------------------------------------------------------------------------------------------------------------|----------------------------------------------------------------------------------------------------------------------|-----------------------------------------|----------------------|------------------------------------------------------------------------------------------------------------------------------------------------------------------------------------------------------------------------------------------------------------------------------------------------------------------------------------------------------------------------------------------------------------------------------------------------------------------------|
|                                                                |              |                                      |                                                                                                                                                                                                                                                                                                                                                                                                                  | Reference<br>product                                                                         | Biosimilar                                                                                                                                                                                                                                                                                                                                                                                                                                        | Reference<br>product                                                                                                 | Biosimilar                              |                      |                                                                                                                                                                                                                                                                                                                                                                                                                                                                        |
|                                                                |              |                                      |                                                                                                                                                                                                                                                                                                                                                                                                                  |                                                                                              |                                                                                                                                                                                                                                                                                                                                                                                                                                                   | not those who<br>were ADAB-<br>positive                                                                              | not those who<br>were ADAB-<br>positive |                      |                                                                                                                                                                                                                                                                                                                                                                                                                                                                        |
| Inflectra<br>(CT-P13,<br>infliximab-<br>dyyb)<br><br>Celltrion | CD, UC       | 21.8%                                | Gecse et al [61]<br>N=210 (Week 14)<br><br>Gonczi et al [71]<br>N=353 (Weeks 14,<br>30, 54 – updated<br>data set)<br><br>Gonczi et al [72]<br>N=291 (Week 54,<br>predictor analysis)<br><br>Prospective,<br>nation-wide<br>Hungarian trial of<br>patients receiving<br>CT-P13; those with<br>clinical remission<br>at Week 14<br>continued receiving<br>treatment until<br>Week 30 (follow-<br>up until Week 54) | n/a                                                                                          | <b>Baseline</b><br><b>All:</b><br>CD: 8.9%<br>(15/169)<br>UC: 11.3%<br>(11/97)<br><br><b>TNFi-naive:</b><br>CD: 3.7%<br>(5/134) <sup>d</sup><br>UC: 5.1% (4/79) <sup>e</sup><br><br><b>TNFi-<br/>experienced:</b><br>CD: 28.6%<br>(10/35) <sup>d</sup><br>UC: 38.9%<br>(7/18) <sup>e</sup><br><br><b>Week 14</b><br><b>All:</b><br>CD: 16.8%<br>(32/190)<br>UC: 21.3%<br>(26/122)<br><br><b>TNFi-naive:</b><br>CD: 11.5%<br>(17/148) <sup>d</sup> | n/a                                                                                                                  | n/a                                     | n/a                  | <b>UC</b><br>Compared with<br>ADAB-negative<br>patients,<br>ADAB-positive<br>patients at<br>Week 14 did<br>not have<br>significantly<br>lower rates of<br>clinical<br>remission at<br>Week 14<br>(62.5% vs<br>66.1%, <i>P</i> =0.79)<br>or Week 30<br>(41.7% vs<br>56.5%, <i>P</i> =0.36<br><br><b>CD</b><br>Compared with<br>ADAB-negative<br>patients,<br>ADAB-positive<br>patients at<br>Week 14 had<br>significantly<br>lower rates of<br>clinical<br>remission at |

| Biosimilar /<br>Manufacturer | Participants | cDMAR<br>D or<br>Previous<br>Therapy | Trial Registration<br>and Design | Patients with ADABs<br>(% of total patients per<br>treatment group, [n <sub>1</sub> /N]x100) |                                                                                                                                                                                                                                                                                                                                                                                                                                                           | Patients with nAbs<br>(% of ADAB-positive patients<br>per treatment group,<br>[n <sub>2</sub> /n <sub>1</sub> ]x100) |            | PK by ADAB<br>Status                                                                                                                                                 | Effect of<br>ADABs on PD,<br>efficacy, and<br>safety<br>parameters |
|------------------------------|--------------|--------------------------------------|----------------------------------|----------------------------------------------------------------------------------------------|-----------------------------------------------------------------------------------------------------------------------------------------------------------------------------------------------------------------------------------------------------------------------------------------------------------------------------------------------------------------------------------------------------------------------------------------------------------|----------------------------------------------------------------------------------------------------------------------|------------|----------------------------------------------------------------------------------------------------------------------------------------------------------------------|--------------------------------------------------------------------|
|                              |              |                                      |                                  | Reference<br>product                                                                         | Biosimilar                                                                                                                                                                                                                                                                                                                                                                                                                                                | Reference<br>product                                                                                                 | Biosimilar |                                                                                                                                                                      |                                                                    |
|                              |              |                                      |                                  |                                                                                              | UC: 18.8%<br>(13/101)<br><br><b>TNFi-<br/>experienced:</b><br>CD: 35.7%<br>(15/42) <sup>d</sup><br>UC: 33.3%<br>(7/21)<br><br><u><b>Week 30</b></u><br><b>All:</b><br>CD: 22.9%<br>(39/170)<br>UC: 25.8%<br>(31/120)<br><br><b>TNFi-naive:</b><br>CD: 19.1%<br>(25/131) <sup>d</sup><br>UC: 23.2%<br>(23/99)<br><br><b>TNFi-<br/>experienced:</b><br>CD: 35.9%<br>(14/39) <sup>d</sup><br>UC: 38.1%<br>(8/21)<br><br><u><b>Week 54</b></u><br><b>All:</b> |                                                                                                                      |            | Week 14<br>(48.5% vs<br>66.9%,<br><i>P</i> =0.04), but not<br>at Week 30<br>(46.2% vs<br>64.2%, <i>P</i> =0.09)<br>or Week 54<br>(45.5% vs<br>60.4%, <i>P</i> =0.24) |                                                                    |

| Biosimilar /<br>Manufacturer                                   | Participants | cDMAR<br>D or<br>Previous<br>Therapy | Trial Registration<br>and Design                                                                                                                                                                                                                                               | Patients with ADABs<br>(% of total patients per<br>treatment group, [n <sub>1</sub> /N]x100) |                                                                                                                                                                                                                                       | Patients with nAbs<br>(% of ADAB-positive patients<br>per treatment group,<br>[n <sub>2</sub> /n <sub>1</sub> ]x100) |            | PK by ADAB<br>Status | Effect of<br>ADABs on PD,<br>efficacy, and<br>safety<br>parameters |
|----------------------------------------------------------------|--------------|--------------------------------------|--------------------------------------------------------------------------------------------------------------------------------------------------------------------------------------------------------------------------------------------------------------------------------|----------------------------------------------------------------------------------------------|---------------------------------------------------------------------------------------------------------------------------------------------------------------------------------------------------------------------------------------|----------------------------------------------------------------------------------------------------------------------|------------|----------------------|--------------------------------------------------------------------|
|                                                                |              |                                      |                                                                                                                                                                                                                                                                                | Reference<br>product                                                                         | Biosimilar                                                                                                                                                                                                                            | Reference<br>product                                                                                                 | Biosimilar |                      |                                                                    |
|                                                                |              |                                      |                                                                                                                                                                                                                                                                                |                                                                                              | CD: 30.6%<br>(38/124)<br>UC: 34.4%<br>(33/96)<br><br><b>TNFi-naive:</b><br>CD: 25.5%<br>(24/94) <sup>d</sup><br>UC: 32.1%<br>(26/81)<br><br><b>TNFi-<br/>experienced:</b><br>CD: 46.7%<br>(14/30) <sup>d</sup><br>UC: 46.7%<br>(7/15) |                                                                                                                      |            |                      |                                                                    |
| Inflectra<br>(CT-P13,<br>infliximab-<br>dyyb)<br><br>Celltrion | UC           | 7.9%                                 | Farkas et al [60]<br>N=63<br><br>14-week,<br>prospective,<br>multicenter,<br>Hungarian and<br>Czech trial of<br>inpatients with<br>acute relapse and<br>outpatients with<br>chronic, steroid-<br>dependent and/or<br>immunodulatory-<br>refractory disease<br>receiving CT-P13 | n/a                                                                                          | <b>Week 14<br/>(all TNFi-<br/>naïve):</b><br>11.1%<br>(7/63)                                                                                                                                                                          | n/a                                                                                                                  | n/a        | n/a                  | n/a                                                                |



| Biosimilar /<br>Manufacturer                                   | Participants | cDMARD or<br>Previous<br>Therapy | Trial Registration<br>and Design                                                                                                                                               | Patients with ADABs<br>(% of total patients per<br>treatment group, [n <sub>1</sub> /N]x100) |                                                                                                                                              | Patients with nAbs<br>(% of ADAB-positive patients<br>per treatment group,<br>[n <sub>2</sub> /n <sub>1</sub> ]x100) |            | PK by ADAB<br>Status                                                                                                                                               | Effect of<br>ADABs on PD,<br>efficacy, and<br>safety<br>parameters |
|----------------------------------------------------------------|--------------|----------------------------------|--------------------------------------------------------------------------------------------------------------------------------------------------------------------------------|----------------------------------------------------------------------------------------------|----------------------------------------------------------------------------------------------------------------------------------------------|----------------------------------------------------------------------------------------------------------------------|------------|--------------------------------------------------------------------------------------------------------------------------------------------------------------------|--------------------------------------------------------------------|
|                                                                |              |                                  |                                                                                                                                                                                | Reference<br>product                                                                         | Biosimilar                                                                                                                                   | Reference<br>product                                                                                                 | Biosimilar |                                                                                                                                                                    |                                                                    |
| Inflectra<br>(CT-P13,<br>infliximab-<br>dyyb)<br><br>Celltrion | CD, UC       | 10.3%                            | Farkas et al [59]<br>N=39<br><br>8-week,<br>prospective, single-<br>center, Hungarian<br>trial of patients<br>receiving CT-P13                                                 | n/a                                                                                          | <b>Week 8:</b><br>19.0%<br>(4/21)                                                                                                            | n/a                                                                                                                  | n/a        | Mean serum<br>IFX levels<br>were<br>significantly<br>lower in<br>ADAB-<br>positive than<br>ADAB-<br>negative<br>patients (1.7<br>mg/L vs 12.8<br>mg/L,<br>P=0.005) | n/a                                                                |
| Inflectra<br>(CT-P13,<br>infliximab-<br>dyyb)<br><br>Celltrion | CD, UC       | 28.2%                            | Jahnsen et al [62]<br>N=78<br><br>14-week,<br>prospective, single-<br>center Norwegian<br>trial of patients<br>receiving CT-P13                                                | n/a                                                                                          | <b>Week 14:</b><br>n=8<br>(denominator<br>value n/a)                                                                                         | n/a                                                                                                                  | n/a        | All 8 patients<br>with trough<br>levels of CT-<br>P13 of 0 mg/L<br>had detectable<br>ADABs                                                                         | n/a                                                                |
| Inflectra<br>(CT-P13,<br>infliximab-<br>dyyb)<br><br>Celltrion | CD, UC       | n/a                              | Buer et al [58] and<br>Høivik et al [73]<br>N=143<br><br>In a single-center<br>Norwegian trial, all<br>patients with IBD<br>treated with INF<br>were switched to<br>CT-P13 and | n/a                                                                                          | <b>Baseline:</b><br>1.4% (2/143)<br><br><b>Month 6<br/>(emergent):</b><br>2.1% (3/143)<br><br><b>Month 18<br/>(overall):</b><br>5.6% (8/143) | n/a                                                                                                                  | n/a        | n/a                                                                                                                                                                | n/a                                                                |

| Biosimilar /<br>Manufacturer                                   | Participants | cDMAR<br>D or<br>Previous<br>Therapy | Trial Registration<br>and Design                                                                                                                                                                                                                                                                                  | Patients with ADABs<br>(% of total patients per<br>treatment group, [n <sub>1</sub> /N]x100) |                                                                                                                                                                                    | Patients with nAbs<br>(% of ADAB-positive patients<br>per treatment group,<br>[n <sub>2</sub> /n <sub>1</sub> ]x100) |            | PK by ADAB<br>Status                                                            | Effect of<br>ADABs on PD,<br>efficacy, and<br>safety<br>parameters |
|----------------------------------------------------------------|--------------|--------------------------------------|-------------------------------------------------------------------------------------------------------------------------------------------------------------------------------------------------------------------------------------------------------------------------------------------------------------------|----------------------------------------------------------------------------------------------|------------------------------------------------------------------------------------------------------------------------------------------------------------------------------------|----------------------------------------------------------------------------------------------------------------------|------------|---------------------------------------------------------------------------------|--------------------------------------------------------------------|
|                                                                |              |                                      |                                                                                                                                                                                                                                                                                                                   | Reference<br>product                                                                         | Biosimilar                                                                                                                                                                         | Reference<br>product                                                                                                 | Biosimilar |                                                                                 |                                                                    |
|                                                                |              |                                      | followed up for 18<br>months                                                                                                                                                                                                                                                                                      |                                                                                              |                                                                                                                                                                                    |                                                                                                                      |            |                                                                                 |                                                                    |
| Inflectra<br>(CT-P13,<br>infliximab-<br>dyyb)<br><br>Celltrion | CD, UC       | TNFi:<br>62.7%                       | Smits et al [66, 75,<br>76]<br>N=83<br><br>In a single-center<br>Dutch trial, all<br>patients with IBD<br>treated with INF<br>were switched to<br>CT-P13 and<br>followed up for 2<br>years                                                                                                                        | n/a                                                                                          | <b>Baseline:</b><br>6.0% (5/83)<br><br><b>Weeks 1-52<br/>(emergent):</b><br>2.4% (2/83)<br><br><b>Weeks 53-104<br/>(emergent):</b><br>0                                            | n/a                                                                                                                  | n/a        | 6 out of 7<br>patients with<br>ADAB had<br>CT-P13 trough<br>levels of 0<br>mg/L | n/a                                                                |
| Inflectra<br>(CT-P13,<br>infliximab-<br>dyyb)<br><br>Celltrion | CD, UC       | n/a                                  | Kolar et al [64]<br>Switch cohort:<br>N=74<br>TNFi-naive cohort:<br>N=119<br><br>Single-center<br>Czech study,<br>consisting of a<br>switch cohort<br>(patients switched<br>from INF to CT-<br>P13 and evaluated<br>prospectively for<br>56 weeks) and a<br>TNFi-naive cohort<br>(patients initiated<br>on CT-P13 | n/a                                                                                          | <b>Switch cohort</b><br><b>Week 0:</b><br>9.5%<br><br><b>Week 56:</b><br>6.0%<br><br><b>TNFi-naive</b><br><b>cohort</b><br><b>Week 14:</b><br>2.8%<br><br><b>Week 46:</b><br>11.7% | n/a                                                                                                                  | n/a        | n/a                                                                             | n/a                                                                |

| Biosimilar /<br>Manufacturer                                   | Participants                      | cDMARD or<br>Previous<br>Therapy | Trial Registration<br>and Design                                                                                                                                                                          | Patients with ADABs<br>(% of total patients per<br>treatment group, [n <sub>1</sub> /N]x100)                                          |                                                                                                                                          | Patients with nAbs<br>(% of ADAB-positive patients<br>per treatment group,<br>[n <sub>2</sub> /n <sub>1</sub> ]x100)                |                                                                                                                                      | PK by ADAB<br>Status                                                                                                                                              | Effect of<br>ADABs on PD,<br>efficacy, and<br>safety<br>parameters                                                                  |
|----------------------------------------------------------------|-----------------------------------|----------------------------------|-----------------------------------------------------------------------------------------------------------------------------------------------------------------------------------------------------------|---------------------------------------------------------------------------------------------------------------------------------------|------------------------------------------------------------------------------------------------------------------------------------------|-------------------------------------------------------------------------------------------------------------------------------------|--------------------------------------------------------------------------------------------------------------------------------------|-------------------------------------------------------------------------------------------------------------------------------------------------------------------|-------------------------------------------------------------------------------------------------------------------------------------|
|                                                                |                                   |                                  |                                                                                                                                                                                                           | Reference<br>product                                                                                                                  | Biosimilar                                                                                                                               | Reference<br>product                                                                                                                | Biosimilar                                                                                                                           |                                                                                                                                                                   |                                                                                                                                     |
|                                                                |                                   |                                  | treatment and<br>evaluated<br>retrospectively at<br>Weeks 14 and 46).                                                                                                                                     |                                                                                                                                       |                                                                                                                                          |                                                                                                                                     |                                                                                                                                      |                                                                                                                                                                   |                                                                                                                                     |
| Inflectra<br>(CT-P13,<br>infliximab-<br>dyyb)<br><br>Celltrion | CD,<br>UC,<br>IBD<br>unclassified | 18.9%                            | Razanskaite et al<br>[65]<br>N=143 (switched<br>patients)<br><br>Prospective cohort<br>from a UK<br>managed-switch<br>program (ADAB<br>evaluations<br>performed after 3-5<br>infusions in 70<br>patients) | n/a                                                                                                                                   | <b>Before switch:</b><br>40.0% (28/70)<br><br><b>After switch:</b><br>40.0% (28/70)                                                      | n/a                                                                                                                                 | n/a                                                                                                                                  | n/a                                                                                                                                                               | n/a                                                                                                                                 |
| <b>Reference product: Rituximab</b>                            |                                   |                                  |                                                                                                                                                                                                           |                                                                                                                                       |                                                                                                                                          |                                                                                                                                     |                                                                                                                                      |                                                                                                                                                                   |                                                                                                                                     |
| <b>Rheumatic<br/>diseases</b>                                  |                                   |                                  |                                                                                                                                                                                                           |                                                                                                                                       |                                                                                                                                          |                                                                                                                                     |                                                                                                                                      |                                                                                                                                                                   |                                                                                                                                     |
| Truxima<br>(CT-P10)<br><br>Celltrion                           | RA, poor<br>response to<br>TNFi   | MTX                              | CT-P10 1.1<br>(NCT01534884)<br>[49, 82]<br>N=154<br><br>Randomized (2:1)<br>double-blind<br>treatment with CT-<br>P10 or RTX<br>(course 1: i.v.<br>infusions at weeks<br>0 and 2); based on               | <b>Weeks 1-24<br/>(1<sup>st</sup> course):</b><br>17.6% (9/51)<br><br><b>Weeks 25-48<br/>(2<sup>nd</sup> course):</b><br>21.7% (5/23) | <b>Weeks 1-24<br/>(1<sup>st</sup> course):</b><br>17.6% (18/102)<br><br><b>Weeks 25-48<br/>(2<sup>nd</sup> course):</b><br>20.0% (12/60) | <b>Weeks 1-24<br/>(1<sup>st</sup> course):</b><br>11.1% (1/9)<br><br><b>Weeks 25-48<br/>(2<sup>nd</sup> course):</b><br>20.0% (1/5) | <b>Weeks 1-24<br/>(1<sup>st</sup> course):</b><br>11.1% (2/18)<br><br><b>Weeks 25-48<br/>(2<sup>nd</sup> course):</b><br>8.3% (1/12) | ADAB-<br>positive<br>patients had a<br>20-30% lower<br>AUC <sub>0-last</sub> and<br>12-21% lower<br>C <sub>max</sub> (mg/L)<br>than ADAB-<br>negative<br>patients | ADAB-positive<br>vs ADAB-<br>negative:<br><br><u>Week 24</u><br><b>ACR20</b><br>RTX: 62.5% vs<br>75.0%<br>CT-P10: 61.1%<br>vs 67.5% |

| Biosimilar /<br>Manufacturer         | Participants                    | cDMARD or<br>Previous<br>Therapy | Trial Registration<br>and Design                                                                                                                                                                                                                                                                                                                                                     | Patients with ADABs<br>(% of total patients per<br>treatment group, [n <sub>1</sub> /N]x100) |                                                                                            | Patients with nAbs<br>(% of ADAB-positive patients<br>per treatment group,<br>[n <sub>2</sub> /n <sub>1</sub> ]x100) |                                                                                | PK by ADAB<br>Status | Effect of<br>ADABs on PD,<br>efficacy, and<br>safety<br>parameters |
|--------------------------------------|---------------------------------|----------------------------------|--------------------------------------------------------------------------------------------------------------------------------------------------------------------------------------------------------------------------------------------------------------------------------------------------------------------------------------------------------------------------------------|----------------------------------------------------------------------------------------------|--------------------------------------------------------------------------------------------|----------------------------------------------------------------------------------------------------------------------|--------------------------------------------------------------------------------|----------------------|--------------------------------------------------------------------|
|                                      |                                 |                                  |                                                                                                                                                                                                                                                                                                                                                                                      | Reference<br>product                                                                         | Biosimilar                                                                                 | Reference<br>product                                                                                                 | Biosimilar                                                                     |                      |                                                                    |
|                                      |                                 |                                  | disease activity,<br>patients could<br>receive a course 2,<br>between weeks 24<br>and 48, with a max.<br>follow-up until<br>Week 72                                                                                                                                                                                                                                                  |                                                                                              |                                                                                            |                                                                                                                      |                                                                                |                      |                                                                    |
| Truxima<br>(CT-P10)<br><br>Celltrion | RA, poor<br>response to<br>TNFi | MTX                              | Extension study<br>CT-P10 1.3<br>(NCT01873443)<br>[48]<br>N=87<br><br>Patients from trial<br>CT-P10 1.1 who<br>had responded to<br>treatment, but<br>whose disease<br>activity or B<br>cell/IgM levels<br>then worsened<br>received 1 or 2<br>courses of CT-P10,<br>with a follow-up of<br>up to 56 weeks;<br>ADABs and nAbs<br>were assessed at<br>Week 24 (post-<br>course 1 only) | n/a                                                                                          | <b>Week 24:</b><br>CT-P10/<br>CT-P10<br>13.2% (5/38)<br><br>RTX/<br>CT-P10<br>15.0% (3/20) | n/a                                                                                                                  | <b>Week 24:</b><br>CT-P10/<br>CT-P10<br>20.0% (1/5)<br><br>RTX/<br>CT-P10<br>0 | n/a                  | n/a                                                                |

| Biosimilar /<br>Manufacturer         | Participants                    | cDMAR<br>D or<br>Previous<br>Therapy | Trial Registration<br>and Design                                                                                                                                                                                                                                                                                                                                                                                                                                                                                                                                 | Patients with ADABs<br>(% of total patients per<br>treatment group, [n <sub>1</sub> /N]x100)                                                                                                                                                                                                                  |                                                                                                                                                                                                                                                                                                                                               | Patients with nAbs<br>(% of ADAB-positive patients<br>per treatment group,<br>[n <sub>2</sub> /n <sub>1</sub> ]x100)                           |                                                                                                                                                                                 | PK by ADAB<br>Status | Effect of<br>ADABs on PD,<br>efficacy, and<br>safety<br>parameters                                                                                                                                                                                                                                       |
|--------------------------------------|---------------------------------|--------------------------------------|------------------------------------------------------------------------------------------------------------------------------------------------------------------------------------------------------------------------------------------------------------------------------------------------------------------------------------------------------------------------------------------------------------------------------------------------------------------------------------------------------------------------------------------------------------------|---------------------------------------------------------------------------------------------------------------------------------------------------------------------------------------------------------------------------------------------------------------------------------------------------------------|-----------------------------------------------------------------------------------------------------------------------------------------------------------------------------------------------------------------------------------------------------------------------------------------------------------------------------------------------|------------------------------------------------------------------------------------------------------------------------------------------------|---------------------------------------------------------------------------------------------------------------------------------------------------------------------------------|----------------------|----------------------------------------------------------------------------------------------------------------------------------------------------------------------------------------------------------------------------------------------------------------------------------------------------------|
|                                      |                                 |                                      |                                                                                                                                                                                                                                                                                                                                                                                                                                                                                                                                                                  | Reference<br>product                                                                                                                                                                                                                                                                                          | Biosimilar                                                                                                                                                                                                                                                                                                                                    | Reference<br>product                                                                                                                           | Biosimilar                                                                                                                                                                      |                      |                                                                                                                                                                                                                                                                                                          |
| Truxima<br>(CT-P10)<br><br>Celltrion | RA, poor<br>response to<br>TNFi | MTX                                  | CT-P10 3.2<br>(NCT02149121)<br>[47, 68]<br>N=372<br><br>Part 1 - PK<br>evaluation<br>(n=189):<br>randomized (1:1:1)<br>to US-RTX, EU-<br>RTX, and CT-P10)<br>Part 2 – efficacy,<br>safety, PD,<br>immunogenicity<br>(n=372): 183<br>newly randomized<br>patients (1:1 to CT-<br>P10 and US-RTX)<br>plus all patients<br>from Part 1 for 24<br>weeks<br><br>Extension period<br>(n=295): patients<br>initially<br>randomized to<br>receive CT-P10<br>continued with<br>their treatment;<br>those randomized<br>to EU-RTX were<br>switched to CT-<br>P10 and those | <b>Baseline:</b><br>9.5%<br>(20/211)<br><br><b>Week 24:</b><br>23.2%<br>(49/211)<br><br>7 patients<br>were ADAB-<br>positive at<br>both Baseline<br>and Week 24<br><br><b>Week 48:</b><br>8.5%<br>(18/211)<br><br><b>Week 72:</b><br>RTX/RTX<br>3.1%<br>(2/64)<br><br>1 patient<br>newly<br>ADAB-<br>positive | <b>Baseline:</b><br>11.8%<br>(19/161)<br><br><b>Week 24:</b><br>14.9%<br>(24/161)<br><br>7 patients were<br>ADAB-positive<br>at both Baseline<br>and Week 24<br><br><b>Week 48:</b><br>4.3%<br>(7/161)<br><br><b>Week 72:</b><br>CT-P10/CT-P10<br>4.1%<br>(5/122)<br><br>RTX/CT-P10<br>10.3% (11/107)<br><br>1 patient newly<br>ADAB-positive | <b>Baseline:</b><br>0<br><br><b>Week 24:</b><br>2.0%<br>(1/49)<br><br><b>Week 48:</b><br>5.5%<br>(1/18)<br><br><b>Week 72:</b><br>RTX/RTX<br>0 | <b>Baseline:</b><br>5.3%<br>(1/19)<br><br><b>Week 24:</b><br>0<br><br><b>Week 48:</b><br>14.3%<br>(1/7)<br><br><b>Week 72:</b><br>CT-P10/CT-<br>P10<br>0<br><br>RTX/CT-P10<br>0 | n/a                  | <b>Trial CT-P10<br/>3.2</b><br><br>ADAB-positive<br>vs ADAB-<br>negative:<br><br><u>IRR, 1<sup>st</sup><br/>treatment<br/>course</u><br>RTX: 6.1% vs<br>8.7%<br>CT-P10: 16.7%<br>vs 14.9%<br><br><u>IRR, 2<sup>nd</sup><br/>treatment<br/>course</u><br>RTX: 4.1% vs<br>4.1%<br>CT-P10: 11.5%<br>vs 7.8% |

| Biosimilar /<br>Manufacturer             | Participants                    | cDMAR<br>D or<br>Previous<br>Therapy | Trial Registration<br>and Design                                                                                                                                                 | Patients with ADABs<br>(% of total patients per<br>treatment group, [n <sub>1</sub> /N]x100) |                                                                | Patients with nAbs<br>(% of ADAB-positive patients<br>per treatment group,<br>[n <sub>2</sub> /n <sub>1</sub> ]x100) |                                                              | PK by ADAB<br>Status                                                                                              | Effect of<br>ADABs on PD,<br>efficacy, and<br>safety<br>parameters |
|------------------------------------------|---------------------------------|--------------------------------------|----------------------------------------------------------------------------------------------------------------------------------------------------------------------------------|----------------------------------------------------------------------------------------------|----------------------------------------------------------------|----------------------------------------------------------------------------------------------------------------------|--------------------------------------------------------------|-------------------------------------------------------------------------------------------------------------------|--------------------------------------------------------------------|
|                                          |                                 |                                      |                                                                                                                                                                                  | Reference<br>product                                                                         | Biosimilar                                                     | Reference<br>product                                                                                                 | Biosimilar                                                   |                                                                                                                   |                                                                    |
|                                          |                                 |                                      | initially<br>randomized to<br>receive US-RTX<br>were re-<br>randomized (1:1)<br>to continue<br>treatment or switch<br>to CT-P10 (follow-<br>up until Week 72)                    |                                                                                              |                                                                |                                                                                                                      |                                                              |                                                                                                                   |                                                                    |
| Rixathon<br>(GP2013)<br><br>Hexal/Sandoz | RA, poor<br>response to<br>TNFi | MTX                                  | GP13-201<br>(NCT01274182)<br>[50]<br>N=312<br><br>Part 1:<br>Randomized (1:1)<br>to receive GP2013<br>or RTX-EU<br>Part 2:<br>Randomized (1:2)<br>to receive GP2013<br>or RTX-US | <b>Overall<br/>post-BL<br/>(Week 24):</b><br>15.1%<br>(25/166)                               | <b>Overall<br/>post-BL<br/>(Week 24):</b><br>16.5%<br>(21/127) | <b>Overall<br/>post-BL<br/>(Week 24):</b><br>4.0%<br>(1/25)                                                          | <b>Overall<br/>post-BL<br/>(Week 24):</b><br>23.8%<br>(5/21) | ADAb-<br>positive<br>patients had a<br>21-37% lower<br>AUC <sub>0-inf</sub> than<br>ADAb-<br>negative<br>patients | n/a                                                                |
| Rixathon<br>(GP2013)<br><br>Hexal/Sandoz | RA,<br>receiving<br>RTX         | MTX                                  | GP13-302<br>(NCT02514772)<br>[51]<br>N=107<br><br>RTX-treated<br>patients were<br>randomized (1:1)<br>to continue with                                                           | <b>Week 24:</b><br>RTX/RTX<br>1.9% (1/53)                                                    | <b>Week 24:</b><br>RTX/GP2013<br>0                             | <b>Week 24:</b><br>RTX/RTX<br>0                                                                                      | <b>Week 24:</b><br>RTX/GP2013<br>0                           | n/a                                                                                                               | n/a                                                                |

| Biosimilar /<br>Manufacturer | Participants                    | cDMAR<br>D or<br>Previous<br>Therapy | Trial Registration<br>and Design                                                                                                                                                                                         | Patients with ADABs<br>(% of total patients per<br>treatment group, $[n_1/N] \times 100$ ) |                                                                   | Patients with nAbs<br>(% of ADAB-positive patients<br>per treatment group,<br>$[n_2/n_1] \times 100$ ) |                          | PK by ADAB<br>Status                                                                                                                                                                         | Effect of<br>ADABs on PD,<br>efficacy, and<br>safety<br>parameters |
|------------------------------|---------------------------------|--------------------------------------|--------------------------------------------------------------------------------------------------------------------------------------------------------------------------------------------------------------------------|--------------------------------------------------------------------------------------------|-------------------------------------------------------------------|--------------------------------------------------------------------------------------------------------|--------------------------|----------------------------------------------------------------------------------------------------------------------------------------------------------------------------------------------|--------------------------------------------------------------------|
|                              |                                 |                                      |                                                                                                                                                                                                                          | Reference<br>product                                                                       | Biosimilar                                                        | Reference<br>product                                                                                   | Biosimilar               |                                                                                                                                                                                              |                                                                    |
|                              |                                 |                                      | RTX or switch to<br>GP2013 (follow-up<br>24 weeks)                                                                                                                                                                       |                                                                                            |                                                                   |                                                                                                        |                          |                                                                                                                                                                                              |                                                                    |
| PF-05280586<br><br>Pfizer    | RA, poor<br>response to<br>TNFi | MTX                                  | REFLECTIONS<br>B328-01<br>(NCT01526057)<br>[52]<br>N=220<br><br>Randomized<br>(1:1:1) for DB<br>treatment with<br>RTX-EU, RTX-<br>US, and PF-<br>05280586 at days 1<br>and 15 (follow-up<br>24 weeks)                    | <b>Week 24:</b><br>RTX-EU:<br>13.5%<br>(10/74)<br><br>RTX-US:<br>12.3%<br>(9/73)           | <b>Week 24:</b><br>9.6%<br>(7/73)                                 | <b>Week 24:</b><br>RTX-EU<br>0<br><br>RTX-US<br>0                                                      | <b>Week 24:</b><br>0     | ADAb-<br>positive<br>patients had<br>lower $AUC_{0-\infty}$<br>and higher<br>clearance rate<br>than ADAb-<br>negative<br>patients                                                            | No                                                                 |
| PF-05280586<br><br>Pfizer    | RA, poor<br>response to<br>TNFi | MTX                                  | REFLECTIONS<br>B328-04<br>(NCT01643928)<br>[53]<br>N=185<br><br>Extension of<br>REFLECTIONS<br>B238-01<br><br>All patients were<br>offered 3 courses<br>of treatment, each<br>course divided into<br>2 infusions 2 weeks | <b>Courses 1-3:</b><br>13.3%<br><br>n/N data are<br>not available                          | <b>Courses 1-3:</b><br>10.0%<br><br>n/N data are not<br>available | <b>Courses 1-3:</b><br>0                                                                               | <b>Courses 1-3:</b><br>0 | ADAb-<br>positive<br>patients had<br>slightly lower<br>drug<br>concentrations,<br>but data should<br>be interpreted<br>with caution<br>due to a small<br>number of<br>patients with<br>ADABs | n/a                                                                |

| Biosimilar /<br>Manufacturer | Participants | cDMAR<br>D or<br>Previous<br>Therapy | Trial Registration<br>and Design                                                                                                                                                                                                                                                                                                                                  | Patients with ADABs<br>(% of total patients per<br>treatment group, [n <sub>1</sub> /N]x100) |            | Patients with nAbs<br>(% of ADAB-positive patients<br>per treatment group,<br>[n <sub>2</sub> /n <sub>1</sub> ]x100) |            | PK by ADAB<br>Status | Effect of<br>ADABs on PD,<br>efficacy, and<br>safety<br>parameters |
|------------------------------|--------------|--------------------------------------|-------------------------------------------------------------------------------------------------------------------------------------------------------------------------------------------------------------------------------------------------------------------------------------------------------------------------------------------------------------------|----------------------------------------------------------------------------------------------|------------|----------------------------------------------------------------------------------------------------------------------|------------|----------------------|--------------------------------------------------------------------|
|                              |              |                                      |                                                                                                                                                                                                                                                                                                                                                                   | Reference<br>product                                                                         | Biosimilar | Reference<br>product                                                                                                 | Biosimilar |                      |                                                                    |
|                              |              |                                      | <p>apart and separated from the next course by 24 ± 8 weeks</p> <p>Course 1: Patients initially randomized to PF-05280586 remained on that treatment; those randomized to RTX-EU or RTX-US were re-randomized (1:1) to continue treatment or receive PF-05280586</p> <p>Courses 2-3: All patients who continued treatment after Course 1 received PF-05280586</p> |                                                                                              |            |                                                                                                                      |            |                      |                                                                    |

<sup>a</sup>Drug tolerance level of the ADA assay was close to the mean trough concentrations at Weeks 4 and 8. Therefore, an observed difference in between-group concentrations at Weeks 4 and 8 may have caused a bias in the ADAB results.

<sup>b</sup>ADAB/Nab prevalence higher than that of historic controls probably due to a higher-sensitivity assays.

<sup>c</sup>ADAB Occurrence in patients who were ADA-negative during weeks 1-54.

<sup>d</sup>For patients with CD, there was a significant difference in the occurrence of ADABs at Baseline ( $P<0.001$ ), Week 14 ( $P<0.001$ ), Week 30 ( $P=0.03$ ), and Week 54 ( $P=0.03$ )

<sup>e</sup>For patients with UC, there was a significant difference in the occurrence of ADABs at Baseline ( $P<0.001$ )



| Biosimilar /<br>Manufacturer                                                                                                                                                                                                                                                                                                                                                                                                                                                                                                                                                                                                                                                                                                                                                                                                                                                                                                                 | Participants | cDMAR<br>D or<br>Previous<br>Therapy | Trial Registration<br>and Design | Patients with ADABs<br>(% of total patients per<br>treatment group, $[n_1/N] \times 100$ ) |            | Patients with nAbs<br>(% of ADAB-positive patients<br>per treatment group,<br>$[n_2/n_1] \times 100$ ) |            | PK by ADAB<br>Status | Effect of<br>ADABs on PD,<br>efficacy, and<br>safety<br>parameters |
|----------------------------------------------------------------------------------------------------------------------------------------------------------------------------------------------------------------------------------------------------------------------------------------------------------------------------------------------------------------------------------------------------------------------------------------------------------------------------------------------------------------------------------------------------------------------------------------------------------------------------------------------------------------------------------------------------------------------------------------------------------------------------------------------------------------------------------------------------------------------------------------------------------------------------------------------|--------------|--------------------------------------|----------------------------------|--------------------------------------------------------------------------------------------|------------|--------------------------------------------------------------------------------------------------------|------------|----------------------|--------------------------------------------------------------------|
|                                                                                                                                                                                                                                                                                                                                                                                                                                                                                                                                                                                                                                                                                                                                                                                                                                                                                                                                              |              |                                      |                                  | Reference<br>product                                                                       | Biosimilar | Reference<br>product                                                                                   | Biosimilar |                      |                                                                    |
| <p>ACR, American College of Rheumatology; ADAB, anti-drug antibody; ADA, adalimumab; AS, ankylosing spondylitis; ASAS, Assessment of Spondyloarthritis International Society; AUC, area under the curve; BL, baseline; CD, Crohn's disease; CDAI, Clinical Disease Activity Index; <math>C_{max}</math>, maximum concentration; CRP, C-reactive protein; DAS28, 28-joint Disease Activity Score; EPAR, European Public Assessment Report; ESR, erythrocyte sedimentation rate; EULAR, European League Against Rheumatism; ETN, etanercept; IBD, inflammatory bowel disease; INF, infliximab; IRR, incidence rate ratio; LDA, low disease activity; MTX, methotrexate; n/a, data not available; nAb, neutralizing antibody; PD, pharmacodynamics; PK, pharmacokinetics; RTX, rituximab; RA, rheumatoid arthritis; SDAI, Simple Disease Activity Index; TNFi, tumor necrosis factor <math>\alpha</math> inhibitor; UC, ulcerative colitis.</p> |              |                                      |                                  |                                                                                            |            |                                                                                                        |            |                      |                                                                    |

## 1. REFERENCES (greyed out items pertain to manuscript text, but not supplementary tables)

1. Dörner T, Strand V, Castaneda-Hernandez G, Ferraccioli G, Isaacs JD, Kvien TK, et al. The role of biosimilars in the treatment of rheumatic diseases. *Ann Rheum Dis*. 2013 Mar;72(3):322-8.
2. Dörner T, Strand V, Cornes P, Goncalves J, Gulacsi L, Kay J, et al. The changing landscape of biosimilars in rheumatology. *Ann Rheum Dis*. 2016 Jun;75(6):974-82.
3. Strand V, Kimberly R, Isaacs JD. Biologic therapies in rheumatology: lessons learned, future directions. *Nat Rev Drug Discov*. 2007 Jan;6(1):75-92.
4. Ellis AG, Flohr C, Drucker AM. Network meta-analyses of systemic treatments for psoriasis: a critical appraisal: Original Articles: Jabbar-Lopez ZK, Yiu ZZN, Ward V et al. Quantitative evaluation of biologic therapy options for psoriasis: a systematic review and network meta-analysis. *J Invest Dermatol* 2017; 137:1646-54. Sbidian E, Chaimani A, Garcia-Doval I et al. Systemic pharmacological treatments for chronic plaque psoriasis: a network meta-analysis. *Cochrane Database Syst Rev* 2017; 12:CD011535. *Br J Dermatol*. 2019 Feb;180(2):282-8.
5. Rawla P, Sunkara T, Raj JP. Role of biologics and biosimilars in inflammatory bowel disease: current trends and future perspectives. *J Inflamm Res*. 2018;11:215-26.
6. Singh JA, Saag KG, Bridges SL, Jr., Akl EA, Bannuru RR, Sullivan MC, et al. 2015 American College of Rheumatology Guideline for the Treatment of Rheumatoid Arthritis. *Arthritis Care Res (Hoboken)*. 2016 Jan;68(1):1-25.

7. Smolen JS, Landewe R, Bijlsma J, Burmester G, Chatzidionysiou K, Dougados M, et al. EULAR recommendations for the management of rheumatoid arthritis with synthetic and biological disease-modifying antirheumatic drugs: 2016 update. *Ann Rheum Dis*. 2017 Jun;76(6):960-77.
8. Guidelines on Evaluation of Similar Biotherapeutic Products (SBPs). 2009 [cited; Available from: [http://www.who.int/biologicals/areas/biological\\_therapeutics/BIOTHERAPEUTICS\\_FOR\\_WEB\\_22APRIL2010.pdf](http://www.who.int/biologicals/areas/biological_therapeutics/BIOTHERAPEUTICS_FOR_WEB_22APRIL2010.pdf)]
9. Guideline on similar biological medicinal products containing biotechnology-derived proteins as active substance: non-clinical and clinical issues (EMA/CHMP/BMWP/42832/2005 Rev1). 2014 [cited; Available from: [http://www.ema.europa.eu/docs/en\\_GB/document\\_library/Scientific\\_guideline/2015/01/WC500180219.pdf](http://www.ema.europa.eu/docs/en_GB/document_library/Scientific_guideline/2015/01/WC500180219.pdf)]
10. Scientific Considerations in Demonstrating Biosimilarity to a Reference Product. Guidance for Industry. 2015 [cited; Available from: <https://www.fda.gov/downloads/Drugs/GuidanceComplianceRegulatoryInformation/Guidances/UCM291128.pdf>]
11. Krieckaert C, Rispens T, Wolbink G. Immunogenicity of biological therapeutics: from assay to patient. *Curr Opin Rheumatol*. 2012 May;24(3):306-11.
12. Guideline on Immunogenicity assessment of therapeutic proteins (EMA/CHMP/BMWP/14327/2006 Rev 1). 2017 [cited; Available from: [http://www.ema.europa.eu/docs/en\\_GB/document\\_library/Scientific\\_guideline/2017/06/WC500228861.pdf](http://www.ema.europa.eu/docs/en_GB/document_library/Scientific_guideline/2017/06/WC500228861.pdf)]
13. Immunogenicity Testing of Therapeutic Protein Products — Developing and Validating Assays for Anti-Drug Antibody Detection. Guidance for Industry. 2019 [cited; Available from: <https://www.fda.gov/media/119788/download>]

14. Shankar G, Arkin S, Cocea L, Devanarayan V, Kirshner S, Kromminga A, et al. Assessment and reporting of the clinical immunogenicity of therapeutic proteins and peptides-harmonized terminology and tactical recommendations. *AAPS J.* 2014 Jul;16(4):658-73.
15. Pineda C, Castaneda Hernandez G, Jacobs IA, Alvarez DF, Carini C. Assessing the Immunogenicity of Biopharmaceuticals. *BioDrugs.* 2016 Jun;30(3):195-206.
16. Gorovits B, Baltrukonis DJ, Bhattacharya I, Birchler MA, Finco D, Sikkema D, et al. Immunoassay methods used in clinical studies for the detection of anti-drug antibodies to adalimumab and infliximab. *Clin Exp Immunol.* 2018 Jun;192(3):348-65.
17. Wang YM, Wang J, Hon YY, Zhou L, Fang L, Ahn HY. Evaluating and Reporting the Immunogenicity Impacts for Biological Products-a Clinical Pharmacology Perspective. *AAPS J.* 2016 Mar;18(2):395-403.
18. Rup B, Pallardy M, Sikkema D, Albert T, Allez M, Broet P, et al. Standardizing terms, definitions and concepts for describing and interpreting unwanted immunogenicity of biopharmaceuticals: recommendations of the Innovative Medicines Initiative ABIRISK consortium. *Clin Exp Immunol.* 2015 Sep;181(3):385-400.
19. Wynne C, Altendorfer M, Sonderegger I, Gheyle L, Ellis-Pegler R, Buschke S, et al. Bioequivalence, safety and immunogenicity of BI 695501, an adalimumab biosimilar candidate, compared with the reference biologic in a randomized, double-blind, active comparator phase I clinical study (VOLTAIRE(R)-PK) in healthy subjects. *Expert Opin Investig Drugs.* 2016 Dec;25(12):1361-70.
20. Shin D, Lee Y, Kim H, Kornicke T, Fuhr R. A randomized phase I comparative pharmacokinetic study comparing SB5 with reference adalimumab in healthy volunteers. *J Clin Pharm Ther.* 2017 Dec;42(6):672-8.

21. Kaur P, Chow V, Zhang N, Moxness M, Kaliyaperumal A, Markus R. A randomised, single-blind, single-dose, three-arm, parallel-group study in healthy subjects to demonstrate pharmacokinetic equivalence of ABP 501 and adalimumab. *Ann Rheum Dis*. 2017 Mar;76(3):526-33.
22. Puri A, Niewiarowski A, Arai Y, Nomura H, Baird M, Dalrymple I, et al. Pharmacokinetics, safety, tolerability and immunogenicity of FKB327, a new biosimilar medicine of adalimumab/Humira, in healthy subjects. *Br J Clin Pharmacol*. 2017 Jul;83(7):1405-15.
23. Assessment Report: Hyrimoz (Procedure No. EMEA/H/C/004320/0000). 2018 [cited; Available from: [https://www.ema.europa.eu/documents/assessment-report/hyrimoz-epar-public-assessment-report\\_en.pdf](https://www.ema.europa.eu/documents/assessment-report/hyrimoz-epar-public-assessment-report_en.pdf)]
24. Hyland E, Mant T, Vlachos P, Atkins N, Ullmann M, Roy S, et al. Comparison of the pharmacokinetics, safety, and immunogenicity of MSB11022, a biosimilar of adalimumab, with Humira((R)) in healthy subjects. *Br J Clin Pharmacol*. 2016 Oct;82(4):983-93.
25. Lee YJ, Shin D, Kim Y, Kang J, Gauliard A, Fuhr R. A randomized phase I pharmacokinetic study comparing SB4 and etanercept reference product (Enbrel(R)) in healthy subjects. *Br J Clin Pharmacol*. 2016 Jul;82(1):64-73.
26. Assessment Report: Erelzi (EMA/CHMP/302222/2017). 2017 [cited; Available from: [https://www.ema.europa.eu/documents/assessment-report/erelzi-epar-public-assessment-report\\_en.pdf](https://www.ema.europa.eu/documents/assessment-report/erelzi-epar-public-assessment-report_en.pdf)]
27. Lee H, Chung H, Lee S, Lee H, Yang SM, Yoon SH, et al. LBEC0101, A Proposed Etanercept Biosimilar: Pharmacokinetics, Immunogenicity, and Tolerability Profiles Compared with a Reference Biologic Product in Healthy Male Subjects. *BioDrugs*. 2017 Aug;31(4):349-55.

28. Shin D, Kim Y, Kim YS, Kornicke T, Fuhr R. A Randomized, Phase I Pharmacokinetic Study Comparing SB2 and Infliximab Reference Product (Remicade((R))) in Healthy Subjects. *BioDrugs*. 2015 Dec;29(6):381-8.
29. Park W, Lee SJ, Yun J, Yoo DH. Comparison of the pharmacokinetics and safety of three formulations of infliximab (CT-P13, EU-approved reference infliximab and the US-licensed reference infliximab) in healthy subjects: a randomized, double-blind, three-arm, parallel-group, single-dose, Phase I study. *Expert Rev Clin Immunol*. 2015;11 Suppl 1:S25-31.
30. Cohen SB, Alonso-Ruiz A, Klimiuk PA, Lee EC, Peter N, Sonderegger I, et al. Similar efficacy, safety and immunogenicity of adalimumab biosimilar BI 695501 and Humira reference product in patients with moderately to severely active rheumatoid arthritis: results from the phase III randomised VOLTAIRE-RA equivalence study. *Ann Rheum Dis*. 2018 Jun;77(6):914-21.
31. Weinblatt ME, Baranauskaite A, Niebrzydowski J, Dokoupilova E, Zielinska A, Jaworski J, et al. Phase III Randomized Study of SB5, an Adalimumab Biosimilar, Versus Reference Adalimumab in Patients With Moderate-to-Severe Rheumatoid Arthritis. *Arthritis Rheumatol*. 2018 Jan;70(1):40-8.
32. Cohen S, Genovese MC, Choy E, Perez-Ruiz F, Matsumoto A, Pavelka K, et al. Efficacy and safety of the biosimilar ABP 501 compared with adalimumab in patients with moderate to severe rheumatoid arthritis: a randomised, double-blind, phase III equivalence study. *Ann Rheum Dis*. 2017 Oct;76(10):1679-87.
33. Assessment Report: Hulio (EMA/H/C/004429/0000). 2018 [cited; Available from: [https://www.ema.europa.eu/documents/assessment-report/hulio-epar-public-assessment-report\\_en.pdf](https://www.ema.europa.eu/documents/assessment-report/hulio-epar-public-assessment-report_en.pdf)

34. Fleischmann RM, Alten R, Pilecky M, Lobello K, Hua SY, Cronenberger C, et al. A comparative clinical study of PF-06410293, a candidate adalimumab biosimilar, and adalimumab reference product (Humira(R)) in the treatment of active rheumatoid arthritis. *Arthritis Res Ther.* 2018 Aug 15;20(1):178.
35. Jani RH, Gupta R, Bhatia G, Rathi G, Ashok Kumar P, Sharma R, et al. A prospective, randomized, double-blind, multicentre, parallel-group, active controlled study to compare efficacy and safety of biosimilar adalimumab (Exemptia; ZRC-3197) and adalimumab (Humira) in patients with rheumatoid arthritis. *Int J Rheum Dis.* 2016 Nov;19(11):1157-68.
36. Emery P, Vencovsky J, Sylwestrzak A, Leszczynski P, Porawska W, Baranauskaite A, et al. A phase III randomised, double-blind, parallel-group study comparing SB4 with etanercept reference product in patients with active rheumatoid arthritis despite methotrexate therapy. *Ann Rheum Dis.* 2017 Jan;76(1):51-7.
37. O'Dell J, Takeuchi T, Tanaka Y, Louw I, Tiabut T, Kai M, et al. OP0226 Randomized, Double-Blind Study Comparing Chs-0214 with Etanercept in Patients with Active Rheumatoid Arthritis (RA) despite Methotrexate (MTX) Therapy. *Annals of the Rheumatic Diseases.* 2016;75(Suppl 2):143.1-.
38. Matsuno H, Tomomitsu M, Hagino A, Shin S, Lee J, Song YW. Phase III, multicentre, double-blind, randomised, parallel-group study to evaluate the similarities between LBEC0101 and etanercept reference product in terms of efficacy and safety in patients with active rheumatoid arthritis inadequately responding to methotrexate. *Ann Rheum Dis.* 2018 Apr;77(4):488-94.

39. Choe JY, Prodanovic N, Niebrzydowski J, Staykov I, Dokoupilova E, Baranauskaite A, et al. A randomised, double-blind, phase III study comparing SB2, an infliximab biosimilar, to the infliximab reference product Remicade in patients with moderate to severe rheumatoid arthritis despite methotrexate therapy. *Ann Rheum Dis.* 2017 Jan;76(1):58-64.
40. Park W, Hrycaj P, Jeka S, Kovalenko V, Lysenko G, Miranda P, et al. A randomised, double-blind, multicentre, parallel-group, prospective study comparing the pharmacokinetics, safety, and efficacy of CT-P13 and innovator infliximab in patients with ankylosing spondylitis: the PLANETAS study. *Ann Rheum Dis.* 2013 Oct;72(10):1605-12.
41. Park W, Yoo DH, Miranda P, Brzosko M, Wiland P, Gutierrez-Urena S, et al. Efficacy and safety of switching from reference infliximab to CT-P13 compared with maintenance of CT-P13 in ankylosing spondylitis: 102-week data from the PLANETAS extension study. *Ann Rheum Dis.* 2017 Feb;76(2):346-54.
42. Takeuchi T, Yamanaka H, Tanaka Y, Sakurai T, Saito K, Ohtsubo H, et al. Evaluation of the pharmacokinetic equivalence and 54-week efficacy and safety of CT-P13 and innovator infliximab in Japanese patients with rheumatoid arthritis. *Mod Rheumatol.* 2015;25(6):817-24.
43. Tweehuysen L, van den Bemt BJF, van Ingen IL, de Jong AJL, van der Laan WH, van den Hoogen FHJ, et al. Subjective Complaints as the Main Reason for Biosimilar Discontinuation After Open-Label Transition From Reference Infliximab to Biosimilar Infliximab. *Arthritis Rheumatol.* 2018 Jan;70(1):60-8.



44. Yoo DH, Hrycaj P, Miranda P, Ramiterre E, Piotrowski M, Shevchuk S, et al. A randomised, double-blind, parallel-group study to demonstrate equivalence in efficacy and safety of CT-P13 compared with innovator infliximab when coadministered with methotrexate in patients with active rheumatoid arthritis: the PLANETRA study. *Ann Rheum Dis*. 2013 Oct;72(10):1613-20.
45. Yoo DH, Prodanovic N, Jaworski J, Miranda P, Ramiterre E, Lanzon A, et al. Efficacy and safety of CT-P13 (biosimilar infliximab) in patients with rheumatoid arthritis: comparison between switching from reference infliximab to CT-P13 and continuing CT-P13 in the PLANETRA extension study. *Ann Rheum Dis*. 2017 Feb;76(2):355-63.
46. Cohen SB, Alten R, Kameda H, Rehman MI, Schumacher K, Schmitt S, et al. A Randomized, Double-Blind Study Comparing PF-06438179/GP1111, a Potential Infliximab Biosimilar, and Infliximab, Both in Combination with MTX, As Treatment for Patients with Moderate to Severe Active RA Who Have Had an Inadequate Response to MTX Therapy [abstract]. *Arthritis Rheumatol*. 2017;69 (suppl 10).
47. Park W, Bozic-Majstorovic L, Milakovic D, Berrocal Kasay A, El-Khoury EC, Irazoque-Palazuelos F, et al. Comparison of biosimilar CT-P10 and innovator rituximab in patients with rheumatoid arthritis: a randomized controlled Phase 3 trial. *MAbs*. 2018 Aug/Sep;10(6):934-43.
48. Park W, Suh CH, Shim SC, Molina FFC, Jeka S, Medina-Rodriguez FG, et al. Efficacy and Safety of Switching from Innovator Rituximab to Biosimilar CT-P10 Compared with Continued Treatment with CT-P10: Results of a 56-Week Open-Label Study in Patients with Rheumatoid Arthritis. *BioDrugs*. 2017 Aug;31(4):369-77.

49. Yoo DH, Suh CH, Shim SC, Jeka S, Cons-Molina FF, Hrycaj P, et al. A multicentre randomised controlled trial to compare the pharmacokinetics, efficacy and safety of CT-P10 and innovator rituximab in patients with rheumatoid arthritis. *Ann Rheum Dis*. 2017 Mar;76(3):566-70.
50. Smolen JS, Cohen SB, Tony HP, Scheinberg M, Kivitz A, Balanescu A, et al. A randomised, double-blind trial to demonstrate bioequivalence of GP2013 and reference rituximab combined with methotrexate in patients with active rheumatoid arthritis. *Ann Rheum Dis*. 2017 Sep;76(9):1598-602.
51. Tony HP, Kruger K, Cohen SB, Schulze-Koops H, Kivitz AJ, Jeka S, et al. Brief Report: Safety and Immunogenicity of Rituximab Biosimilar GP 2013 After Switch From Reference Rituximab in Patients With Active Rheumatoid Arthritis. *Arthritis Care Res (Hoboken)*. 2019 Jan;71(1):88-94.
52. Cohen S, Emery P, Greenwald M, Yin D, Becker JC, Melia LA, et al. A phase I pharmacokinetics trial comparing PF-05280586 (a potential biosimilar) and rituximab in patients with active rheumatoid arthritis. *Br J Clin Pharmacol*. 2016 Jul;82(1):129-38.
53. Cohen SB, Burgos-Vargas R, Emery P, Jin B, Cronenberger C, Vazquez-Abad MD. Extension Study of PF-05280586, a Potential Rituximab Biosimilar, Versus Rituximab in Subjects With Active Rheumatoid Arthritis. *Arthritis Care Res (Hoboken)*. 2018 Nov;70(11):1598-606.

54. Papp K, Bachelez H, Costanzo A, Foley P, Gooderham M, Kaur P, et al. Clinical similarity of biosimilar ABP 501 to adalimumab in the treatment of patients with moderate to severe plaque psoriasis: A randomized, double-blind, multicenter, phase III study. *J Am Acad Dermatol*. 2017 Jun;76(6):1093-102.
55. Blauvelt A, Lacour JP, Fowler JF, Jr., Weinberg JM, Gospodinov D, Schuck E, et al. Phase III randomized study of the proposed adalimumab biosimilar GP2017 in psoriasis: impact of multiple switches. *Br J Dermatol*. 2018 Sep;179(3):623-31.
56. Griffiths CEM, Thaci D, Gerdes S, Arenberger P, Pulka G, Kingo K, et al. The EGALITY study: a confirmatory, randomized, double-blind study comparing the efficacy, safety and immunogenicity of GP2015, a proposed etanercept biosimilar, vs. the originator product in patients with moderate-to-severe chronic plaque-type psoriasis. *Br J Dermatol*. 2017 Apr;176(4):928-38.
57. Ben-Horin S, Yavzori M, Benhar I, Fudim E, Picard O, Ungar B, et al. Cross-immunogenicity: antibodies to infliximab in Remicade-treated patients with IBD similarly recognise the biosimilar Remsima. *Gut*. 2016 Jul;65(7):1132-8.
58. Buer LC, Moum BA, Cvancarova M, Warren DJ, Medhus AW, Hoivik ML. Switching from Remicade(R) to Remsima(R) is well Tolerated and Feasible: A Prospective, Open-label Study. *J Crohns Colitis*. 2017 Mar 1;11(3):297-304.
59. Farkas K, Rutka M, Balint A, Nagy F, Bor R, Milassin A, et al. Efficacy of the new infliximab biosimilar CT-P13 induction therapy in Crohn's disease and ulcerative colitis - experiences from a single center. *Expert Opin Biol Ther*. 2015;15(9):1257-62.
60. Farkas K, Rutka M, Golovics PA, Vegh Z, Lovasz BD, Nyari T, et al. Efficacy of Infliximab Biosimilar CT-P13 Induction Therapy on Mucosal Healing in Ulcerative Colitis. *J Crohns Colitis*. 2016 Nov;10(11):1273-8.

61. Gecse KB, Lovasz BD, Farkas K, Banai J, Bene L, Gasztonyi B, et al. Efficacy and Safety of the Biosimilar Infliximab CT-P13 Treatment in Inflammatory Bowel Diseases: A Prospective, Multicentre, Nationwide Cohort. *J Crohns Colitis*. 2016 Feb;10(2):133-40.
62. Jahnsen J, Detlie TE, Vatn S, Ricanek P. Biosimilar infliximab (CT-P13) in the treatment of inflammatory bowel disease: A Norwegian observational study. *Expert Rev Gastroenterol Hepatol*. 2015;9 Suppl 1:45-52.
63. Jørgensen KK, Olsen IC, Goll GL, Lorentzen M, Bolstad N, Haavardsholm EA, et al. Switching from originator infliximab to biosimilar CT-P13 compared with maintained treatment with originator infliximab (NOR-SWITCH): a 52-week, randomised, double-blind, non-inferiority trial. *Lancet*. 2017 Jun 10;389(10086):2304-16.
64. Kolar M, Duricova D, Bortlik M, Hrubá V, Machkova N, Mitrova K, et al. Infliximab Biosimilar (Remsima) in Therapy of Inflammatory Bowel Diseases Patients: Experience from One Tertiary Inflammatory Bowel Diseases Centre. *Dig Dis*. 2017;35(1-2):91-100.
65. Razanskaite V, Bettey M, Downey L, Wright J, Callaghan J, Rush M, et al. Biosimilar Infliximab in Inflammatory Bowel Disease: Outcomes of a Managed Switching Programme. *J Crohns Colitis*. 2017 Jun 1;11(6):690-6.
66. Smits LJ, Derikx LA, de Jong DJ, Boshuizen RS, van Esch AA, Drenth JP, et al. Clinical Outcomes Following a Switch from Remicade(R) to the Biosimilar CT-P13 in Inflammatory Bowel Disease Patients: A Prospective Observational Cohort Study. *J Crohns Colitis*. 2016 Nov;10(11):1287-93.
67. CT-P13 (infliximab biosimilar). Briefing Document for the Arthritis Advisory Committee. 2016 [cited; Available from: <https://www.fda.gov/downloads/advisorycommittees/committeesmeetingmaterials/drugs/arthritisadvisorycommittee/ucm484860.pdf>]

68. CTP-10 - A Proposed Biosimilar to Rituxan(R) - FDA Advisory Committee Meeting Briefing Document. 2018 [cited; Available from: <https://www.fda.gov/downloads/AdvisoryCommittees/CommitteesMeetingMaterials/Drugs/OncologicDrugsAdvisoryCommittee/UCM622647.pdf>]
69. Papp K, Bachelez H, Costanzo A, Foley P, Gooderham M, Kaur P, et al. Clinical similarity of the biosimilar ABP 501 compared with adalimumab after single transition: long-term results from a randomized controlled, double-blind, 52-week, phase III trial in patients with moderate-to-severe plaque psoriasis. *Br J Dermatol*. 2017 Dec;177(6):1562-74.
70. Weinblatt ME, Baranauskaite A, Dokoupilova E, Zielinska A, Jaworski J, Racewicz A, et al. Switching From Reference Adalimumab to SB5 (Adalimumab Biosimilar) in Patients With Rheumatoid Arthritis: Fifty-Two-Week Phase III Randomized Study Results. *Arthritis Rheumatol*. 2018 Jun;70(6):832-40.
71. Gonczi L, Gecse KB, Vegh Z, Kurti Z, Rutka M, Farkas K, et al. Long-term Efficacy, Safety, and Immunogenicity of Biosimilar Infliximab After One Year in a Prospective Nationwide Cohort. *Inflamm Bowel Dis*. 2017 Nov;23(11):1908-15.
72. Gonczi L, Vegh Z, Golovics PA, Rutka M, Gecse KB, Bor R, et al. Prediction of Short- and Medium-term Efficacy of Biosimilar Infliximab Therapy. Do Trough Levels and Antidrug Antibody Levels or Clinical And Biochemical Markers Play the More Important Role? *J Crohns Colitis*. 2017 Jun 1;11(6):697-705.
73. Høivik ML, Buer LCT, Cvancarova M, Warren DJ, Bolstad N, Moum BA, et al. Switching from originator to biosimilar infliximab - real world data of a prospective 18 months follow-up of a single-centre IBD population. *Scand J Gastroenterol*. 2018 Jun;53(6):692-9.

74. Park W, Yoo DH, Jaworski J, Brzezicki J, Gnylorybov A, Kadinov V, et al. Comparable long-term efficacy, as assessed by patient-reported outcomes, safety and pharmacokinetics, of CT-P13 and reference infliximab in patients with ankylosing spondylitis: 54-week results from the randomized, parallel-group PLANETAS study. *Arthritis Res Ther*. 2016 Jan 20;18:25.
75. Smits LJT, Grelack A, Derikx L, de Jong DJ, van Esch AAJ, Boshuizen RS, et al. Long-Term Clinical Outcomes After Switching from Remicade((R)) to Biosimilar CT-P13 in Inflammatory Bowel Disease. *Dig Dis Sci*. 2017 Nov;62(11):3117-22.
76. Smits LJT, van Esch AAJ, Derikx L, Boshuizen R, de Jong DJ, Drenth JPH, et al. Drug Survival and Immunogenicity After Switching From Remicade to Biosimilar CT-P13 in Inflammatory Bowel Disease Patients: Two-year Follow-up of a Prospective Observational Cohort Study. *Inflamm Bowel Dis*. 2019 Jan 1;25(1):172-9.
77. Smolen JS, Choe JY, Prodanovic N, Niebrzydowski J, Staykov I, Dokoupilova E, et al. Comparing biosimilar SB2 with reference infliximab after 54 weeks of a double-blind trial: clinical, structural and safety results. *Rheumatology (Oxford)*. 2017 Oct 1;56(10):1771-9.
78. Smolen JS, Choe JY, Prodanovic N, Niebrzydowski J, Staykov I, Dokoupilova E, et al. Safety, immunogenicity and efficacy after switching from reference infliximab to biosimilar SB2 compared with continuing reference infliximab and SB2 in patients with rheumatoid arthritis: results of a randomised, double-blind, phase III transition study. *Ann Rheum Dis*. 2018 Feb;77(2):234-40.
79. Emery P, Vencovsky J, Sylwestrzak A, Leszczynski P, Porawska W, Baranauskaite A, et al. 52-week results of the phase 3 randomized study comparing SB4 with reference etanercept in patients with active rheumatoid arthritis. *Rheumatology (Oxford)*. 2017 Dec 1;56(12):2093-101.

80. Emery P, Vencovsky J, Sylwestrzak A, Leszczynski P, Porawska W, Stasiuk B, et al. Long-term efficacy and safety in patients with rheumatoid arthritis continuing on SB4 or switching from reference etanercept to SB4. *Ann Rheum Dis*. 2017 Aug 9.
81. Gerdes S, Thaçi D, Griffiths CEM, Arenberger P, Poetzl J, Wuerth G, et al. Multiple switches between GP2015, an etanercept biosimilar, with originator product do not impact efficacy, safety and immunogenicity in patients with chronic plaque-type psoriasis: 30-week results from the phase 3, confirmatory EGALITY study. *J Eur Acad Dermatol Venereol*. 2018 Mar;32(3):420-7.
82. Yoo DH, Suh CH, Shim SC, Jeka S, Molina FFC, Hrycaj P, et al. Efficacy, Safety and Pharmacokinetics of Up to Two Courses of the Rituximab Biosimilar CT-P10 Versus Innovator Rituximab in Patients with Rheumatoid Arthritis: Results up to Week 72 of a Phase I Randomized Controlled Trial. *BioDrugs*. 2017 Aug;31(4):357-67.
83. Girolomoni G, Feldman SR, Emery P, Ghil J, Keum JW, Cheong SY, et al. Comparison of injection-site reactions between the etanercept biosimilar SB4 and the reference etanercept in patients with rheumatoid arthritis from a phase III study. *Br J Dermatol*. 2018 Mar;178(3):e215-e6.
84. Reinisch W, Jahnsen J, Schreiber S, Danese S, Panes J, Balsa A, et al. Evaluation of the Cross-reactivity of Antidrug Antibodies to CT-P13 and Infliximab Reference Product (Remicade): An Analysis Using Immunoassays Tagged with Both Agents. *BioDrugs*. 2017 Jun;31(3):223-37.
85. Ruiz-Arguello MB, Maguregui A, Ruiz Del Agua A, Pascual-Salcedo D, Martinez-Feito A, Jurado T, et al. Antibodies to infliximab in Remicade-treated rheumatic patients show identical reactivity towards biosimilars. *Ann Rheum Dis*. 2016 Sep;75(9):1693-6.

86. Goncalves J, Santos M, Acurcio R, Iria I, Gouveia L, Matos Brito P, et al. Antigenic response to CT-P13 and infliximab originator in inflammatory bowel disease patients shows similar epitope recognition. *Aliment Pharmacol Ther.* 2018 Sep;48(5):507-22.
87. Benucci M, Gobbi FL, Bandinelli F, Damiani A, Infantino M, Grossi V, et al. Safety, efficacy and immunogenicity of switching from innovator to biosimilar infliximab in patients with spondyloarthritis: a 6-month real-life observational study. *Immunol Res.* 2017 Feb;65(1):419-22.
88. Strand V, Balsa A, Al-Saleh J, Barile-Fabris L, Horiuchi T, Takeuchi T, et al. Immunogenicity of Biologics in Chronic Inflammatory Diseases: A Systematic Review. *BioDrugs.* 2017 Aug;31(4):299-316.
89. Moots RJ, Curiale C, Petersel D, Rolland C, Jones H, Mysler E. Efficacy and Safety Outcomes for Originator TNF Inhibitors and Biosimilars in Rheumatoid Arthritis and Psoriasis Trials: A Systematic Literature Review. *BioDrugs.* 2018 Jun;32(3):193-9.
90. Kim JS, Kim SH, Kwon B, Hong S. Comparison of immunogenicity test methods used in clinical studies of infliximab and its biosimilar (CT-P13). *Expert Rev Clin Immunol.* 2015;11 Suppl 1:S33-41.
91. Talotta R, Berzi A, Doria A, Batticciotto A, Ditto MC, Atzeni F, et al. The Immunogenicity of Branded and Biosimilar Infliximab in Rheumatoid Arthritis According to Th9-Related Responses. *Int J Mol Sci.* 2017 Oct 12;18(10).
92. Schulz KF, Altman DG, Moher D, Group C. CONSORT 2010 Statement: updated guidelines for reporting parallel group randomised trials. *BMC Med.* 2010 Mar 24;8:18.
